1 **Mechanical stimulation promotes enthesis injury repair by mobilizing Prx1<sup>+</sup> cells via**  
2 **ciliary TGF- $\beta$  signaling**

3  
4  
5 Han Xiao<sup>1,2,3,4</sup>, Tao Zhang<sup>1,2,3,4</sup>, Changjun Li<sup>5</sup>, Yong Cao<sup>2,3,4,6</sup>, Linfeng Wang<sup>1,2,3,4</sup>, Huabin  
6 Chen<sup>1,2,3,4</sup>, Shengcan Li<sup>1,2,3,4</sup>, Changbiao Guan<sup>1,2,3,4</sup>, Jianzhong Hu<sup>2,3,4,6</sup>, Di Chen<sup>7</sup>, Can  
7 Chen<sup>2,3,4,7\*</sup>, Hongbin Lu<sup>1,2,3,4\*</sup>

8  
9  
10 1. Department of Sports Medicine, Xiangya Hospital, Central South University, Changsha  
11 410008, China;

12 2. Key Laboratory of Organ Injury, Aging and Regenerative Medicine of Hunan Province,  
13 Changsha 410008, China;

14 3. Xiangya Hospital-International Chinese Musculoskeletal Research Society Sports Medicine  
15 Research Centre, Changsha 410008, China;

16 4. Hunan Engineering Research Center of Sport and Health, Changsha 410008, China;

17 5. Department of Endocrinology, Xiangya Hospital, Central South University, Changsha  
18 410008, China;

19 6. Department of Spine Surgery, Xiangya Hospital, Central South University, Changsha  
20 410008, China;

21 7. Faculty of Pharmaceutical Sciences, Shenzhen Institute of Advanced Technology, Chinese  
22 Academy of Sciences, Shenzhen 518055, China;

23 8. Department of Orthopedic, Xiangya Hospital, Central South University, Changsha 410008,  
24 China.

25  
26  
27  
28  
29  
30  
31 \* Corresponding author: Hongbin Lu (M.D. & Ph.D., Xiangya Hospital, Central South  
32 University, No. 87, Xiangya Road, Kaifu District, Changsha 410008, Phone: +86-731-  
33 89753059, Email: hongbinlu@hotmail.com); Can Chen (M.D. & Ph.D., Xiangya Hospital,  
34 Central South University, No. 87, Xiangya Road, Kaifu District, Changsha 410008, Phone:  
35 +86-731-89753007, Email: chencanwow@foxmail.com; [chencan@csu.edu.cn](mailto:chencan@csu.edu.cn))  
36  
37  
38  
39  
40  
41  
42  
43  
44  
45  
46

47 **Abstract**

48 Proper mechanical stimulation can improve rotator cuff enthesis injury repair. However,  
49 the underlying mechanism of mechanical stimulation promoting injury repair is still unknown.  
50 In this study, we found that Prx1<sup>+</sup> cell was essential for murine rotator cuff enthesis  
51 development identified by single-cell RNA sequence and involved in the injury repair. Proper  
52 mechanical stimulation could promote the migration of Prx1<sup>+</sup> cells to enhance enthesis injury  
53 repair. Meantime, TGF- $\beta$  signaling and primary cilia played an essential role in mediating  
54 mechanical stimulation signaling transmission. Proper mechanical stimulation enhanced the  
55 release of active TGF- $\beta$ 1 to promote migration of Prx1<sup>+</sup> cells. Inhibition of TGF- $\beta$  signaling  
56 eliminated the stimulatory effect of mechanical stimulation on Prx1<sup>+</sup> cell migration and enthesis  
57 injury repair. In addition, knockdown of *Pallidin* to inhibit TGF- $\beta$ R2 translocation to the  
58 primary cilia or deletion of *IFT88* in Prx1<sup>+</sup> cells also restrained the mechanics-induced Prx1<sup>+</sup>  
59 cells migration. These findings suggested that mechanical stimulation could increase the release  
60 of active TGF- $\beta$ 1 and enhance the mobilization of Prx1<sup>+</sup> cells to promote enthesis injury repair  
61 via ciliary TGF- $\beta$  signaling.

62

63 **Keywords:** Enthesis, Mechanical stimulation, Primary cilia, Prx1<sup>+</sup> cells, TGF- $\beta$

64

65

66

## 67 **Introduction**

68 Rotator cuff (RC) tear is common in modern sports activity, which often causes persistent  
69 shoulder pain and dysfunction.<sup>[1]</sup> Surgical repair has been a well-established and commonly  
70 accepted treatment for severe RC tear, especially when conservative treatment fails.<sup>[2,3]</sup> It has  
71 been reported that approximately 450,000 patients were accepted RC repairs surgery annually  
72 in the United States.<sup>[4]</sup> However, the results of surgical repair are not always satisfactory.<sup>[5]</sup>  
73 Previous studies have shown structural failure of the RC repair ranging from 16% to 94%, with  
74 poor outcomes associated with failed microstructure regeneration of RC enthesis.<sup>[4,6,7]</sup>  
75 Histologically, the RC enthesis has been consisted of 4 distinct yet continuous tissue layers:  
76 bone, calcified cartilage, uncalcified cartilage, and tendon. This kind of structure can subtly  
77 transfer force from muscle to bone, while enthesis functional injury repair remains an  
78 insurmountable challenge in sports medicine.<sup>[8]</sup> Therefore, how to promote regeneration of the  
79 enthesis is an urgent problem for clinicians.

80 Moderate mechanical load is essential for enthesis development and maintenance.<sup>[9]</sup>  
81 Meanwhile, the clinical application of mechanobiological principles following enthesis injury  
82 forms the basic rehabilitation protocols.<sup>[10,11]</sup> However, there is a debate about the initiating  
83 time and strength of mechanical stimulation during enthesis healing procedure.<sup>[12]</sup> In clinical  
84 treatment, a traditional rehabilitation program after RC repair has been suggested to delay  
85 mechanical exercise (immobilization for about six weeks),<sup>[13]</sup> while an accelerated protocol  
86 suggests that an immediate exercise with limited range of motion would be better for tendon  
87 healing.<sup>[14]</sup> Zhang et al adopted treadmill training<sup>[14]</sup> at postoperative day seven on murine enthesis  
88 injury repair model and found that mechanical stimulation could improve enthesis fibrocartilage  
89 and bone regeneration and obtained better mechanical parameters.<sup>[15]</sup> Although we know that  
90 there is a correlation between appropriate mechanical stimulation and high quality of enthesis  
91 healing, the uncovering mechanism is poorly understood. Revealing the cellular and molecular  
92 processes of enthesis healing with mechanical stimulation after surgical repair will allow

93 clinicians to implement preventative interventions and prescribe proper therapeutics to improve  
94 clinical outcomes.

95 During the wound regeneration procedure, soluble inflammatory mediators bind to cell  
96 surface or cytoplasmic receptors, and lead to recruitment of immune cells, stem cells and tissue-  
97 resident cells by activating signaling cascades.<sup>[16]</sup> As we known, stem cells are essential for  
98 entheses regeneration. *Prx1* is a paired-related homeobox gene that is expressed in  
99 undifferentiated mesenchymal stem cells in the developing limb buds.<sup>[17]</sup> A previous study  
100 showed that *Prx1* transgene marked osteochondral progenitors in the periosteum and played an  
101 essential role in skeletal development.<sup>[18]</sup> Mice lacking *Prx1* transgenes would show  
102 craniofacial defect, limb shortening, and incompletely penetrant Spina bifida.<sup>[19]</sup> Considering  
103 *Prx1*<sup>+</sup> cells are indispensable stem cell lineage for the musculoskeletal system, we want to  
104 specifically reveal the role of *Prx1*<sup>+</sup> cells in entheses injury repair and uncover the mechanism of  
105 mechanical stimulation on improving entheses injury repair in this study.

106 Primary cilia is an antenna-like sensory organelle based on immotile microtubule, and  
107 present on nearly every cell type, including mesenchymal stem cells, endothelial cells (ECs),  
108 epithelial cells, fibroblasts, and other cells in vertebrates.<sup>[20-23]</sup> Primary cilia contains a distinct  
109 subset of receptors and other proteins, which make it a sophisticated signaling center  
110 functioning as mechanosensor and chemosensation.<sup>[24-27]</sup> Previous study also found that  
111 translocating receptors to the primary cilia could enhance the signaling transmission.<sup>[28]</sup> Defect  
112 or dysfunction of primary cilia could lead to severe disorders of the body, which is known as  
113 ciliopathies, such as polycystic kidney disease, primary ciliary dyskinesia, retinopathies,  
114 combined developmental deficiencies, and other sensory disorders.<sup>[29-33]</sup> Genetic deletion of  
115 *IFT88*, an encoded protein closely associated with cilia formation and maintenance, could  
116 decrease the load-induced bone formation.<sup>[34]</sup> At the same time, the primary cilia is a hub for  
117 transducing biophysical and hedgehog signals to regulate tendon entheses formation and

118 adaptation to loading.<sup>[35,36]</sup> Therefore, we wonder if primary cilia also plays an important role  
119 in mechanical stimulation signal transmission during entheses healing procedure.

120 In this study, we first revealed the characteristics of Prx1<sup>+</sup> cells in the developing entheses  
121 by single cell RNA sequencing (scRNA-seq) and examined the dynamic pattern of Prx1<sup>+</sup> cells  
122 in murine RC entheses at different ages. Then, we used the murine entheses injury model to find  
123 out the mechanism of proper mechanical stimulation on stimulating Prx1<sup>+</sup> cell migration and  
124 entheses injury repair. Our data demonstrated that appropriate mechanical stimulation could  
125 increase the release of active TGF- $\beta$ 1 and enhance mobilization of Prx1<sup>+</sup> cells to promote  
126 entheses injury repair via ciliary TGF- $\beta$  signaling.

127

## 128 **Results**

### 129 **scRNA-seq analysis reveals the cell populations in the developing entheses**

130 To determine the cellular composition of the developing entheses, we isolated and  
131 sequenced transcriptomes of individual live CD45<sup>-</sup>Ter119<sup>-</sup> cells from the murine entheses (from  
132 the fully patterned limb at E15.5 to early maturity of entheses with appearance of a modest 4-  
133 zone structure at P28) based on 10 $\times$  Genomics system (Fig. 1a, b). After sequencing and data  
134 quality processing, we got high-quality transcriptomic data from 21532 single-cells, including  
135 8919 E15.5 cells, 7489 P7 cells, and 5124 P28 cells. The single cell RNA sequencing (scRNA-  
136 seq) data had high read depth for most of the single cell samples (Figure S1, Supporting  
137 Information). We carried out unbiased clustering analysis for all single-cells and identified 23  
138 major cell populations in the developing entheses by Seurat analysis (Fig. 1c). Through  
139 differential gene expression analysis, we annotated 15 clusters into distinct cell types or states  
140 based on the expression of genes uniquely or in combinations represented individual cluster  
141 identities (Fig. S2). Feature plot showed the canonical marker genes, which enriched in seven  
142 entheses related clusters: BMSCs, Fibroblastic cells, Tenocytes, Chondrocytes, Proliferative  
143 stromal cells, Osteoblast/Osteocyte (OB/Ocy), Lepr<sup>+</sup> cells (Fig. 1d). Cell fraction related to

144 entheses development showed that the rate of OB/Ocy and  $Lepr^+$  cells increased significantly  
 145 in P7 and P28, which was consistent with the entheses mineralization procedure. At the same  
 146 time, chondrocytes were high in E15.5, P7 and decreased significantly in P28(Fig. 1e). These  
 147 data suggested that the maturation of entheses was highly correlated with osteochondrogenesis  
 148 procedure.

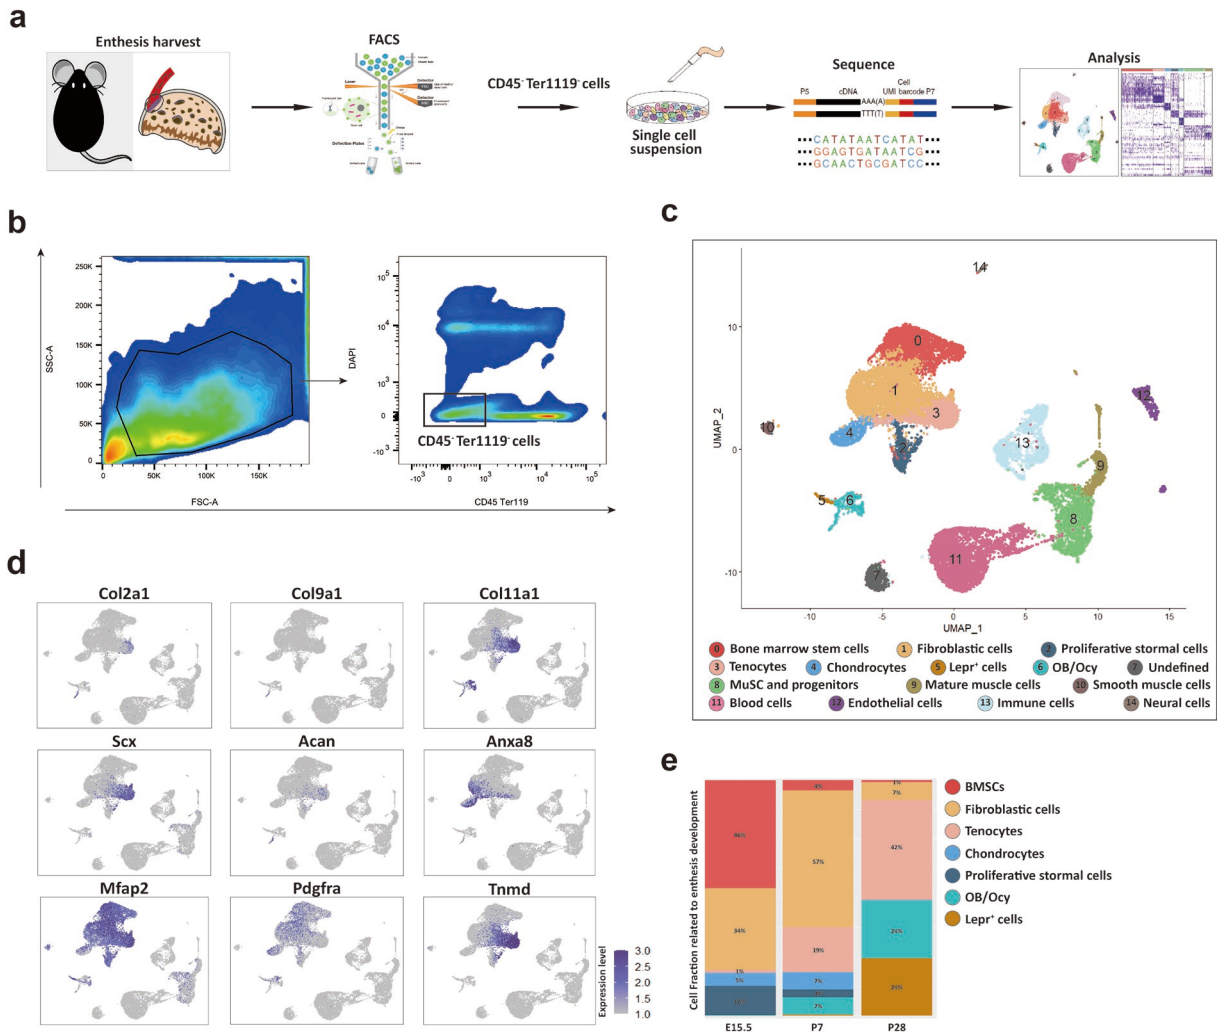

149  
 150 **Figure 1. scRNA-seq analysis reveals the cell populations in the developing entheses.** (a)  
 151 The flow chart of scRNA-seq analysis. (b) Isolation of CD45<sup>+</sup>Ter119<sup>-</sup> cells by FACS. (c) All  
 152 cell clusters visualized with uniform manifold projection (UMAP). (d) Feature plot of canonical  
 153 marker genes enriched in clusters defines entheses related clusters. (e) entheses development  
 154 related cell composition at E15.5, P7, and P28.

155

## 156 **scRNA-Seq distinguishes Prx1<sup>+</sup> cells during entheses development**

157 To examine the role of Prx1<sup>+</sup> cells in entheses development, 5607 Prx1<sup>+</sup> cells from  
158 mouse entheses (E15.5, P7, and P28) were analyzed and were grouped into five distinct clusters:  
159 BMSCs, Fibroblastic cells, Tenocytes, Chondrocytes, Lepr<sup>+</sup> cells. *Prx1* expression was  
160 relatively high in E15.5 and P7, while decreased significantly in P28 (Fig. 2a). Pseudotime  
161 ordering of Prx1<sup>+</sup> cells from the entheses related five clusters were reconstructed by Monocle,  
162 an unsupervised algorithm (Figure 2b). The trend of reconstructed trajectory was consistent  
163 with the time point (Figure 2c upper panel), which could represent the temporal  
164 (stem/progenitor and teno/osteochondro lineage) relationships during the development of  
165 entheses. The reconstructed trajectory tree colored by clusters shows some overlap along the  
166 pseudotime (Figure 2c lower panel). These results indicated that Prx1<sup>+</sup> cells were highly  
167 involved in entheses development via differentiating into tenocytes, osteoblasts/osteocytes or  
168 chondrocytes. To further analyze differential gene expression of Prx1<sup>+</sup> cells in E15.5, P7, and  
169 P28, GO enrichment analysis was performed and representative GO terms in represented  
170 biological processes were illustrated (Figure 2d). The results showed that the ribonucleoprotein  
171 complex biogenesis and assembly activities were significantly upregulated in E15.5, while  
172 extracellular matrix organization activities in P7 and ossification activities in P28. These data  
173 suggested that Prx1<sup>+</sup> cells could be the potential reliable progenitors for entheses development.

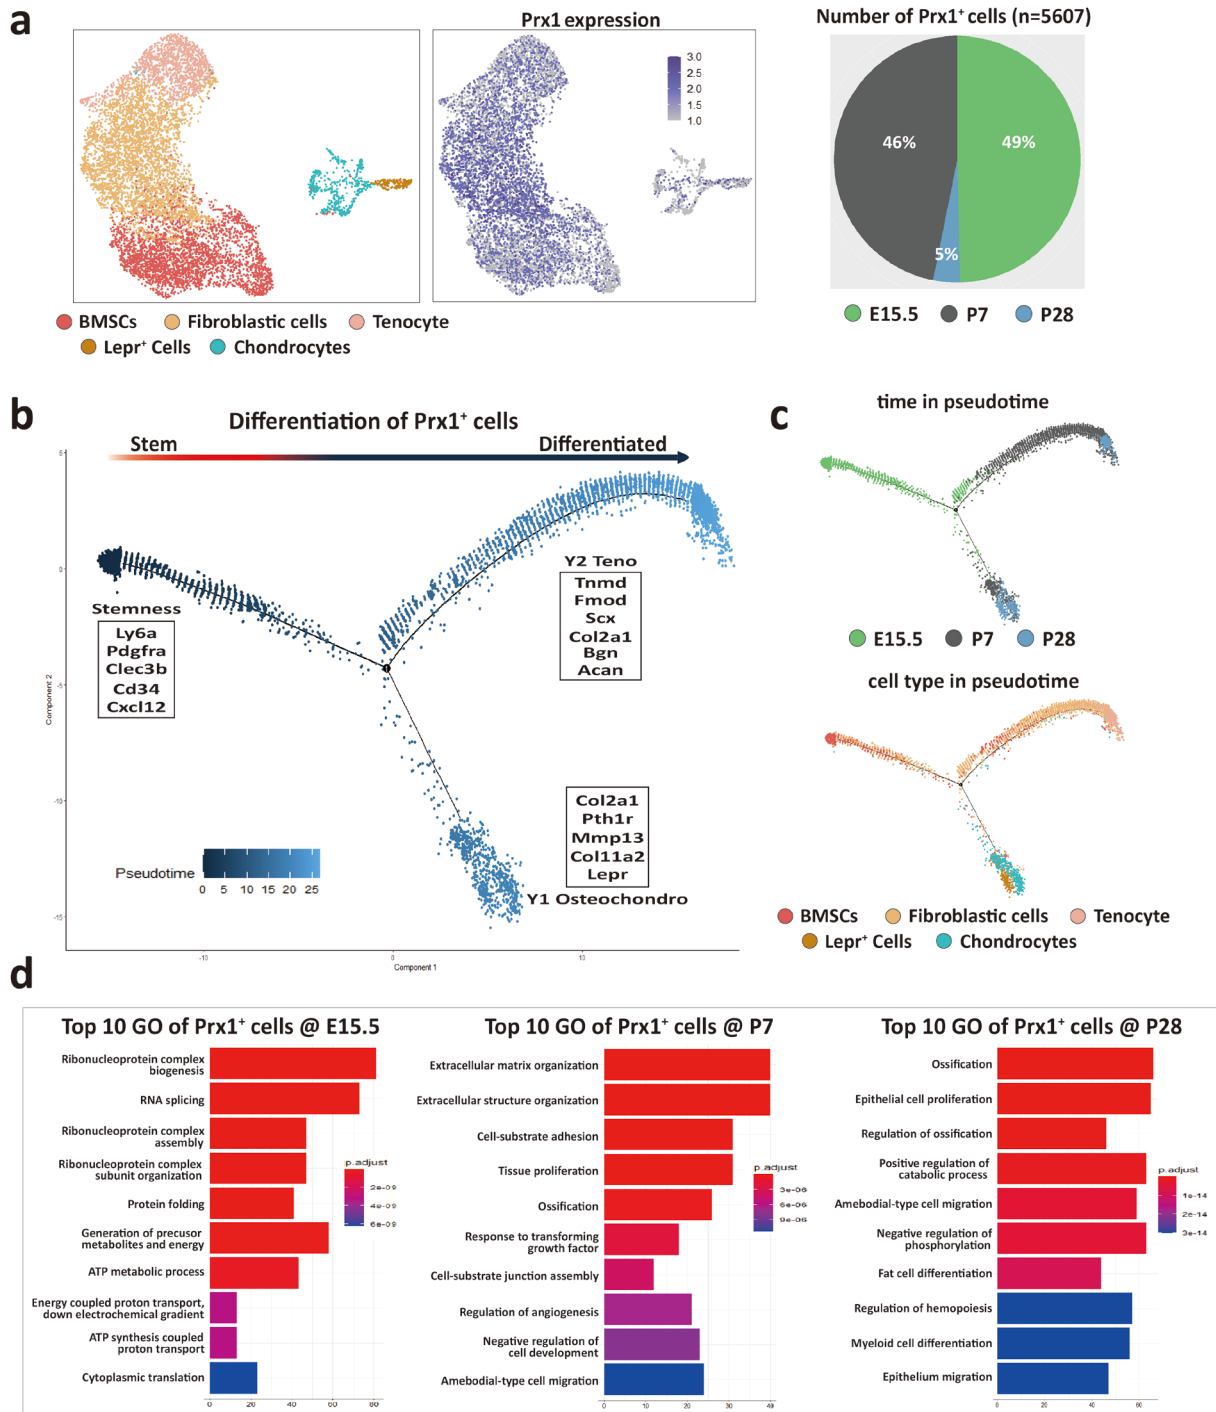

174

175 **Figure 2. scRNA-Seq distinguishes *Prx1*<sup>+</sup> cells during enthesis development.** (a) 5607 *Prx1*<sup>+</sup>  
 176 cells from mouse supraspinatus enthesis (E15.5, P7, and P28) were grouped into five distinct  
 177 clusters (colors indicated). Each point represents an individual cell; Right panel shows the  
 178 expression level of *Prx1* within enthesis -related clusters. (b) Differentiation trajectory of  
 179 enthesis -related cells constructed by Monocle and was colored by pseudotime order. Branches  
 180 on the 2D trajectory tree are indicated as tenogenic branch (Y1) and osteochondrogenic branch



181 (Y2). (c) Uper panel was colored by real time-point and lower panel was colored by cell clusters,  
182 respectively. (d) The enriched GO terms (biological processes) of differentially expressed genes  
183 in entheses development related *Prx1*<sup>+</sup> cells at E15.5, P7, and P28, respectively.

184

## 185 **Lineage tracing of *Prx1*<sup>+</sup> cells in murine rotator cuff entheses development and injury** 186 **repair**

187 To understand the dynamic pattern of *Prx1*<sup>+</sup> cells in rotator cuff entheses, we performed  
188 immunostaining of the murine humeral head, using *Prx1CreER-GFP* transgenic mice at P7,  
189 P28, and P56. We found that active *Prx1*<sup>+</sup> cells (high expression of GFP) were abundant on the  
190 peripheral humeral head in young mice and decreased markedly during late adulthood (Figure  
191 3a). At the entheses, we found active *Prx1*<sup>+</sup> cells were present during the early postnatal period,  
192 while they decreased significantly with age, then, disappeared and were confined within the  
193 perichondrium at adulthood (Figure 3b, c). To investigate the degree of *Prx1*<sup>+</sup> cells participating  
194 in entheses development at a different age, we generated *Prx1CreER; R26R-tdTomato* mice to  
195 permanently label the cells coming from *Prx1*<sup>+</sup> cell pool. We respectively injected a single dose  
196 of tamoxifen (100 mg/kg, i.p.) into 2 weeks, 4 weeks and 8 weeks old *Prx1CreER; R26R-*  
197 *tdTomato* mice and performed immunostaining at 12 weeks (Figure 3d). We found that most of  
198 the cells in the entheses originated from *Prx1*<sup>+</sup> cells at the 2W-12W group. At the same time,  
199 this involvement decreased significantly at the 4W-12W group and disappeared at the 8W-12W  
200 group. *Prx1*<sup>+</sup> cells participated in the development of entheses, including the continuous four  
201 gradient layer structure: bone, calcified fibrocartilage, uncalcified fibrocartilage, and tendon  
202 (Figure 3e, f). These findings suggested that *Prx1*<sup>+</sup> cell was a vital subpopulation of  
203 mesenchymal stem cells for entheses regeneration.

204 To verify whether *Prx1*<sup>+</sup> cells participated in adult murine entheses injury healing,  
205 *Prx1CreER; R26R-tdTomato* mice (12 weeks old) were performed RC injury after injected a  
206 single dose of tamoxifen (100 mg/kg, i.p.). At postoperative 4 weeks, mice were sacrificed for

207 immunofluorescence (Figure 1g). We found that  $Prx1^+$  cells were activated and migrated from  
 208 the surrounding area to the injury site to participate in the enthesis healing via differentiating  
 209 into osteocytes or chondrocytes (Figure 3h, i).

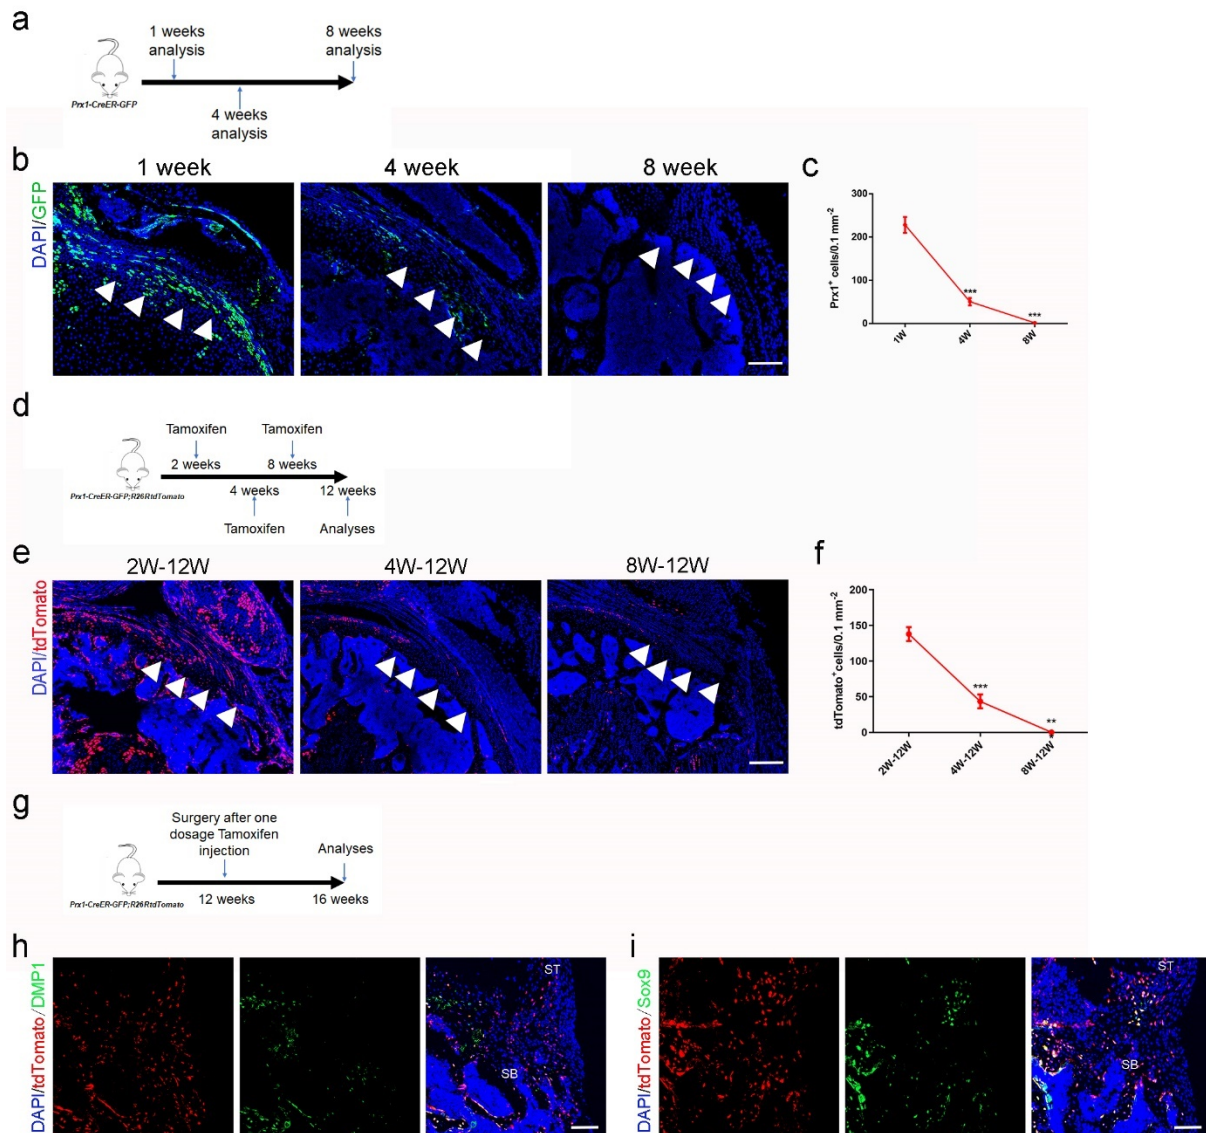

210

211 **Figure 3.  $Prx1^+$  cells are involved in rotator cuff enthesis development and injury**  
 212 **regeneration.** (a) Schematic diagram of *Prx1CreER-GFP* mice, which were sacrificed at 1, 4,  
 213 and 8 weeks after surgery for immunofluorescent analysis. (b) Representative  
 214 immunofluorescent images of GFP staining of active  $Prx1^+$  cells (green) and DAPI (blue)  
 215 staining of nuclei in murine humeral head at postnatal 1, 4 and 8 weeks. Scale bars, 200  $\mu$ m. (c)  
 216 Quantitative analysis of the number of active  $Prx1^+$  cells in enthesis. n=6 per group. (d)

217 Schematic diagram of *Prx1CreER-GFP; R26R-tdTomato* mice, which were sacrificed for  
218 immunofluorescent analysis at 12 weeks after tamoxifen administration at Postnatal 2, 4, and 8  
219 weeks. (e) Representative immunofluorescent images of tdTomato<sup>+</sup> cells (Prx1<sup>+</sup> cells, red) and  
220 DAPI (blue) staining of nuclei in murine humeral head at postnatal 12 weeks after injection  
221 with tamoxifen respectively at postnatal 2, 4 and 8 weeks. Scale bars, 200  $\mu$ m. (f) Quantitative  
222 analysis of the number of tdTomato<sup>+</sup> cells in enthesis. n=6 per group. (g) Schematic diagram of  
223 *Prx1CreER-GFP; R26R-tdTomato* mice which were received acute enthesis injury and  
224 sacrificed for immunofluorescent analysis at 4 weeks after surgery after single dose tamoxifen  
225 injection. (h) Representative immunofluorescent images of tdTomato<sup>+</sup> cells (Prx1<sup>+</sup> cells, red)  
226 in murine enthesis at postoperative 4 weeks. Scale bars, 100 $\mu$ m. (i) Quantitative analysis of the  
227 number of tdTomato<sup>+</sup> cells in enthesis. n=6 per group. All data were reported as mean  $\pm$  SD.  
228 The white triangles indicated the area of enthesis. SB, subchondral bone; ST: supraspinatus  
229 tendon. \*P < 0.05, \*\*P < 0.01, \*\*\*P < 0.001.

230

### 231 **Proper mechanical stimulation improves the enthesis injury repair**

232 To find out if the proper mechanical stimulation could improve enthesis injury repair, the  
233 mice began to receive treadmill training at 1 week after enthesis surgery with different treadmill  
234 training (0 minutes per day, 10 minutes per day, 20 minutes per day and 30 minutes per day, 5  
235 consecutive days per week). At 4 and 8 weeks after surgery, mice were sacrificed for histology  
236 and mechanical test analysis (Figure 4a). We found that treadmill training with 20 minutes per  
237 day showed better tissue maturation, collagen arrangement (Figure 4b), higher histological  
238 scores (Figure 4c), and more fibrocartilage regeneration (Figure 4d). The best mechanical  
239 results of RC have also occurred at the group receiving 20 minutes treadmill training per day  
240 (Figure 4e). These results indicated that proper mechanical stimulation could improve enthesis  
241 healing, which is correlated with the increased numbers of Prx1<sup>+</sup> cells.

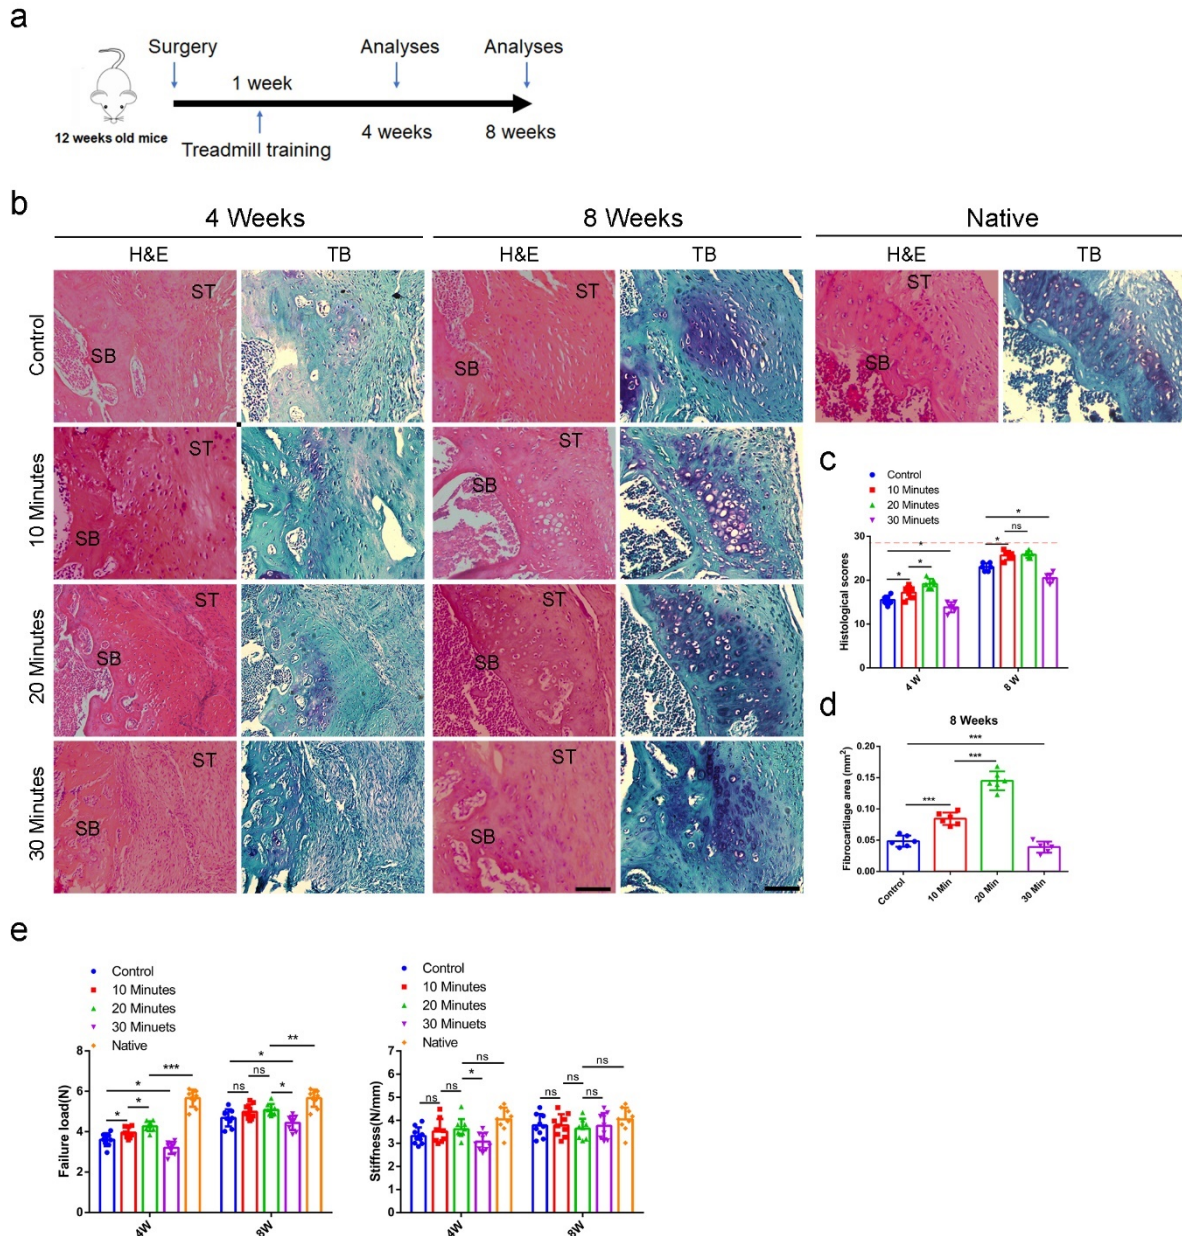

242

243 **Figure 4. Proper mechanical stimulation could improve the enthesis injury repair. (a)**

244 Representative image of H&E and Toluidine blue/Fast green staining of enthesis. Scale bar,

245 200  $\mu\text{m}$ . (b) Quantitative analysis of H&E score. The red dotted line indicated the perfect

246 histological score of 28. n=6 per group. (c) Quantitative analysis of fibrocartilage thickness.

247 n=6 per group. (d) Quantitative analysis of Failure Load and stiffness. n=9 per group. SB,

248 subchondral bone; ST: supraspinatus tendon. \*P < 0.05, \*\*P < 0.01, \*\*\*P < 0.001, ns P > 0.05.

249

250 **Proper mechanical stimulation mobilize the Prx1<sup>+</sup> cells to participate in entheses injury**  
251 **repair**

252 To investigate the potential role of mechanical stimuli on Prx1<sup>+</sup> cells and the relationship  
253 between Prx1<sup>+</sup> cells number and repair quality, we performed lineage tracing analysis using  
254 *Prx1CreER; R26R-tdTomato* mice. After receiving entheses injury repair surgery followed with  
255 a single dose of tamoxifen (100 mg/kg, i.p.), the mice started to receive different treadmill  
256 training (0 minutes per day, 10 minutes per day, 20 minutes per day, and 30 minutes per day, 5  
257 consecutive days per week) at 1 week after surgery (Figure 5a). We found that Prx1<sup>+</sup> cells were  
258 absent at the entheses in adult mice (Figure 5b). Prx1<sup>+</sup> cells could migrate from the nearby tissue  
259 to the healing area at 2 weeks after surgery (Figure 5b). The 10-minutes and 20-minutes  
260 treadmill training could significantly enhance the migration of Prx1<sup>+</sup> cells to the healing area  
261 compared with the group without treadmill training. Excessive treadmill training decreased the  
262 migration of Prx1<sup>+</sup> cells to the healing area (Figure 5c).

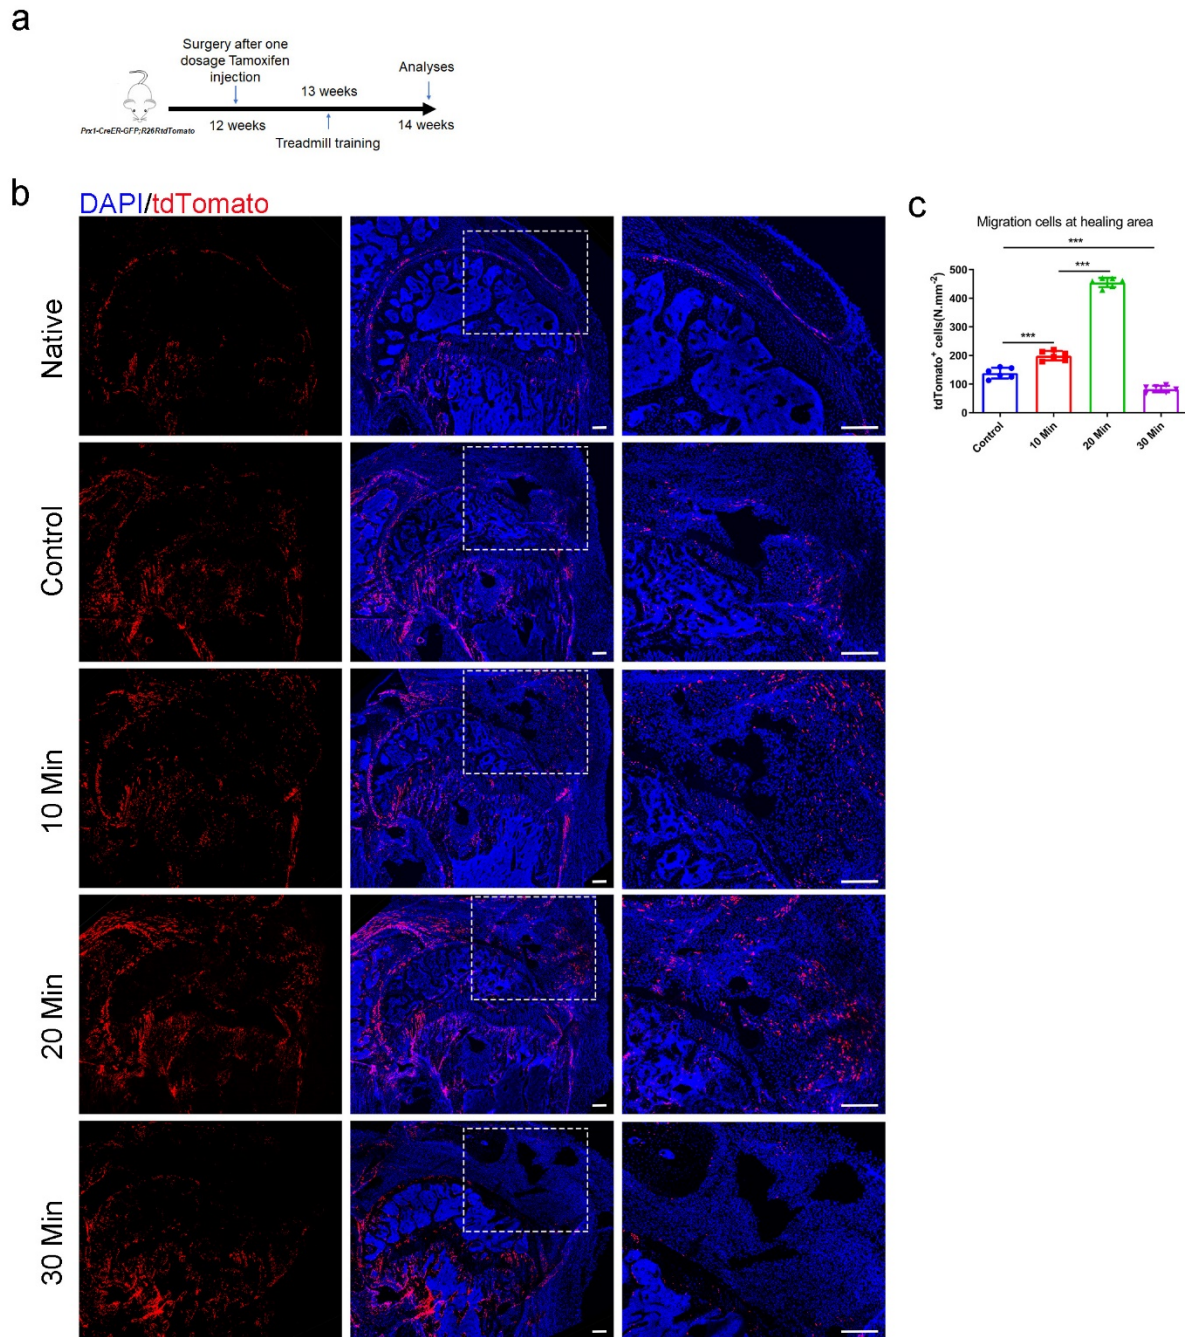

263

264 **Figure 5. Proper mechanical stimuli could enhance the migration of Prx1<sup>+</sup> cells to**

265 **participate in enthesis healing.** (a) Schematic diagram of *Prx1CreER-GFP; R26R-tdTomato*

266 mice which were received enthesis surgery and sacrificed for immunofluorescent analysis at 14

267 weeks after surgery after single dose tamoxifen injection. (b) Representative immunofluorescent

268 images of Tdtomato (red) staining of Prx1<sup>+</sup> cells and DAPI (blue) staining of nuclei under

269 different mechanical stimuli. Scale bar, 200  $\mu\text{m}$ . (c) Quantitative analysis of migration Prx1<sup>+</sup>  
270 cells at the healing area. n=6 per group. Scale bar, 200  $\mu\text{m}$ . \*P < 0.05, \*\*P < 0.01, \*\*\*P < 0.001.

271

### 272 **TGF- $\beta$ 1 mediated mechanical stimulation to enhance enthesis injury repair**

273 Previous report showed that TGF- $\beta$ 1 can recruit mesenchymal stem cells to maintain the  
274 balance of bone resorption and formation.<sup>[37]</sup> The GO analysis found that Prx1<sup>+</sup> cells were  
275 highly responded to TGF- $\beta$  at P7, when enthesis initial mineralization began. Therefore, we  
276 hypothesized that TGF- $\beta$ 1 played an important role in enthesis repair process. First, we  
277 harvested the enthesis samples to perform ELISA analysis to reveal the content of active TGF-  
278  $\beta$ 1 during enthesis repair procedure (Figure 6a). We found that active TGF- $\beta$ 1 concentration  
279 increased and reached the peak at 2 weeks after surgery. Then, it returned to its basal level at  
280 10 weeks. Meantime, mechanical stimulation could stimulate the release of active TGF- $\beta$ 1  
281 during the repair procedure (Figure 6b).

282 To investigate the role of TGF- $\beta$ 1 during enthesis repair procedure, mice were received  
283 enthesis surgery and treated with or without TGF- $\beta$ 1 neutralizing antibody (ab64715). At 4 and  
284 8 weeks, mice were sacrificed for histological and mechanical test analysis. The results showed  
285 that highly cellular, fibrovascular granulation tissue were observed at the supraspinatus enthesis  
286 in all groups at 4 weeks after surgery. Fibrovascular scar in the groups without ab64715 were  
287 relatively organized in H&E staining. Results of toluidine blue/fast green staining exhibited that  
288 mature fibrocartilage occurred more in groups without ab64715 than other groups with ab64715  
289 (P<0.05 for all). Well-organized soft tissue and tidemark at the enthesis occurred at 8 weeks  
290 after surgery. However, enthesis in groups treated with ab64715 showed weak remodeling  
291 tissue than the groups without ab64715. The fibrocartilage was thinner in the groups with  
292 ab64715 than that in other groups without ab64715 (P<0.05 for all) (Figure 6c, d). The  
293 mechanical test showed that groups with ab64715 had lower failure load and stiffness than other  
294 groups without ab64715 at each time point (P<0.05 for all) (Figure 6e).

295 To understand if TGF- $\beta$ 1 also mediated the migration of Prx1<sup>+</sup> cells to participate in  
296 entheses injury repair, we performed lineage tracing analysis using *Prx1CreER; R26R-tdTomato*  
297 mice. After a single dose of tamoxifen (100 mg/kg, i.p.) injection, the mice were received  
298 surgery to create an entheses repair model with or without ab64715 treatment. Mice began to  
299 receive treadmill training (20 minutes per day, five consecutive days per week) at 1 week after  
300 surgery and were sacrificed for immunofluorescence analysis at 2 weeks. We found that  
301 treadmill training could enhance Prx1<sup>+</sup> cells to the healing area and this effect could be  
302 eliminated by the treatment with TGF- $\beta$ 1 neutralizing antibody (Figure 6f).

303 To find out if mechanical stimulation could have independent effect on Prx1<sup>+</sup> cells  
304 migration, we isolated Prx1<sup>+</sup> cells and investigated the effect of mechanical stimulation on  
305 Prx1<sup>+</sup> cells with or without TGF- $\beta$ 1. We used a special dish that could load tensile force to  
306 Prx1<sup>+</sup> cells (Figure S3a). After 4 consecutive days of mechanical stimuli (5%, 0.5 Hz, 20  
307 minutes per day) with TGF- $\beta$ 1 (0.1 ng/ml), Prx1<sup>+</sup> cell migration ability was analyzed by scratch  
308 assay and Transwell assay. We found that mechanical stimulation could not independently  
309 enhance the Prx1<sup>+</sup> cell migration ability. At the same time, TGF- $\beta$ 1 could improve its migration  
310 ability, and this effect could be significantly stimulated by mechanical stimulation (Figure S3b,  
311 c, d). Western blot showed that pSmad2/3 was activated during this process (Figure S3e, f).  
312 These results indicated that treadmill training mobilised Prx1<sup>+</sup> cells to enhance entheses injury  
313 repair mainly by mediating the release of active TGF- $\beta$ 1.



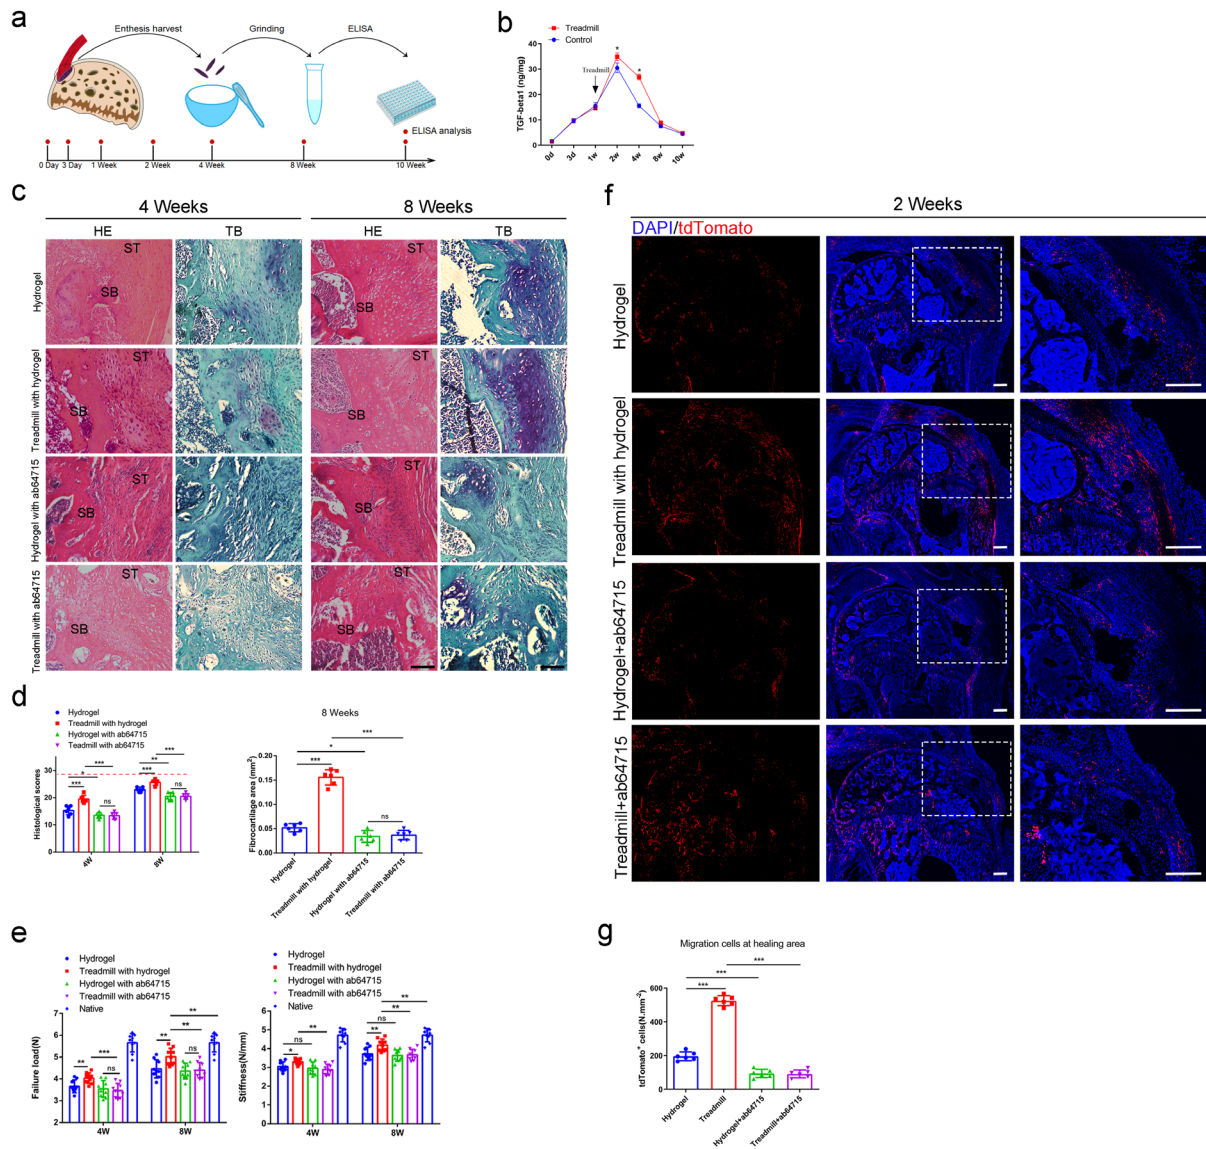

314  
 315 **Figure 6. TGF-β1 mediated mechanical stimulation to enhance enthesis injury repair.** (a)  
 316 Schematic diagram of ELISA analysis. (b) ELISA analysis of TGF-β1 concentration during the  
 317 enthesis healing procedure. n=3 per group. (c) Representative image of H&E and Toluidine  
 318 blue/Fast green staining of enthesis. Scale bar, 200 μm. (d) Quantitative analysis of H&E score  
 319 and fibrocartilage thickness. The red dotted line indicated the perfect histological score of 28. n=6  
 320 per group. (e) Quantitative analysis of Failure Load and stiffness. n=9 per group. (f)  
 321 Representative immunofluorescent images of Tdtomato (red) staining of Prx1<sup>+</sup> cells and DAPI  
 322 (blue) staining of nuclei under different mechanical stimuli at postoperative 2 weeks. Scale bar,  
 323 200 μm. (g) Quantitative analysis of migration Prx1<sup>+</sup> cells at the healing area. n=6 per group.  
 324 \*P < 0.05, \*\*P < 0.01, \*\*\*P < 0.001.

325 **Primary cilia was essential for TGF- $\beta$  signaling to promote enthesis injury repair**

326 Previous studies showed that there were many receptors in primary cilia, which played an  
327 essential role in signal transmission.<sup>[27,38-40]</sup> To determine whether the primary cilia plays an  
328 essential role in the transmission of TGF- $\beta$  signaling, we created the primary cilia conditional  
329 knocked out transgenic mice. *Prx1CreER; IFT88<sup>fllox/fllox</sup>; R26R-tdTomato* mice and *Prx1CreER;*  
330 *R26R-tdTomato* mice were received enthesis injury repair surgery after 5 days continuous  
331 tamoxifen injection (75mg/Kg, i.p.). The mice were recieved treadmill training at the day 7  
332 after surgery (20 minutues per day, 5 days per week) and sacrificed for assessment at 4 and 8  
333 weeks. Results showed that conditional ablation of *IFT88* in *Prx1<sup>+</sup>* cells significantly damaged  
334 the primary cilia (Figure 8a, b). Without the primary cilia, mechanical stimulation could not  
335 enhance the migration of *Prx1<sup>+</sup>* cells to the healing area (Figure 8c, d). Results of H&E staining  
336 showed that less scar tissue formed at the enthesis at 4 weeks after surgery, and there was no  
337 significant difference in histological scores between the primary cilia dysfunction groups with  
338 or without treadmill training. No fibrocartilage was found in both groups at this time point. At  
339 8 weeks after surgery, H&E staining showed high cellular, fibrovascular granulation tissue at  
340 the enthesis. Meanwhile, few fibrocartilage tissues were found at the enthesis site in these two  
341 *IFT88* damaged groups. There was no significant difference in H&E scores and the  
342 fibrocartilage area between the mice with or without treadmill training (Figure 8e, f, g). No  
343 significant difference in failure load and stiffness was found between the mice with or without  
344 treadmill training (Figure 8j).

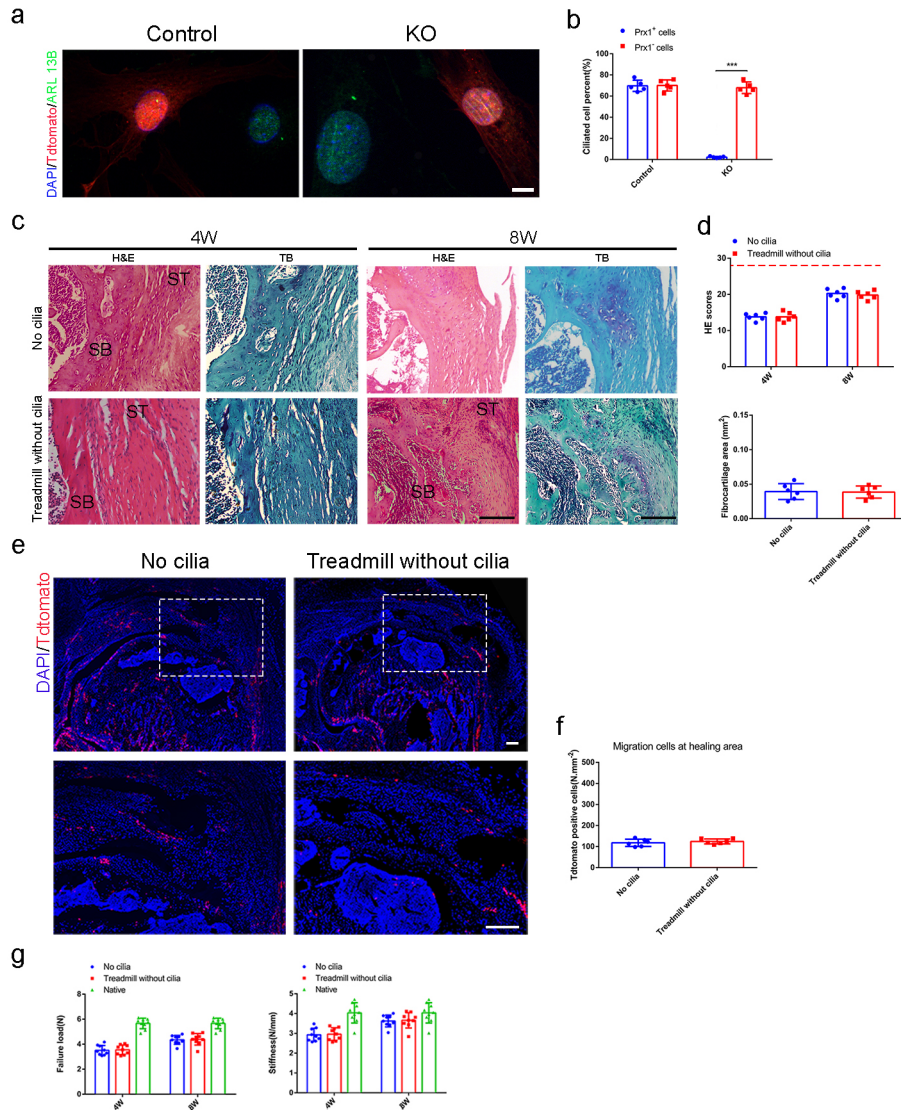

345  
 346 **Figure 7. Primary cilia was essential for TGF- $\beta$  signaling to promote enthesis injury**  
 347 **repair.** (a) Representative immunofluorescence image of tdTomato (red) staining of Prx1<sup>+</sup> cells,  
 348 ARL 13B (green) staining of primary cilia, and DAPI (blue) staining of nuclei. Scale bar, 5  $\mu$ m.  
 349 (b) Quantitative analyses of ciliated cell percent in Prx1<sup>+</sup> cells and Prx1<sup>-</sup> cells. n=5 per group.  
 350 (c) Representative image of H&E and Toluidine blue/Fast green staining of enthesis. Scale bar,  
 351 200  $\mu$ m. (d) Quantitative analysis of H&E score and fibrocartilage area at the enthesis. The red  
 352 dotted line stands for perfect H&E scores of 28. n=6 per group. (e) Representative  
 353 immunofluorescence image of tdTomato (red) staining of Prx1<sup>+</sup> cells, DAPI (blue) staining of  
 354 nuclei at the enthesis. Scale bar, 200  $\mu$ m. (f) Quantitative analyses of Tdtomato<sup>+</sup> cells in the

355 healing area. n=6 per group. (g) Quantitative analyses of load failure and stiffness of enthesis.  
356 n=9 per group. SB, subchondral bone; ST: supraspinatus tendon. \*\*\*P < 0.001.

357

### 358 **TGF- $\beta$ 1 enhanced the migration of Prx1<sup>+</sup> cells via ciliary TGF- $\beta$ signaling**

359 To investigate the relationship between primary cilia and TGF- $\beta$  signaling pathway, we  
360 isolated the Prx1<sup>+</sup> cells and examined the distribution of TGF- $\beta$  receptor 2 (TGF- $\beta$ R2) in the  
361 cells with or without mechanical stimulation. Results showed that TGF- $\beta$ R2 existed on the  
362 surface of Prx1<sup>+</sup> cells. At the same time, TGF- $\beta$ R2 was concentrated in the primary cilia under  
363 the effect of TGF- $\beta$ 1 (0.1 ng/ml), and mechanical stimuli could improve TGF- $\beta$ R2 translocated  
364 into the primary cilia (Figure 7a, b). To understand if ciliary TGF- $\beta$ R2 was essential for TGF-  
365  $\beta$  signaling transmission, we used shRNA to knock down pallidin (PLDN) in Prx1<sup>+</sup> cells, which  
366 could inhibit TGF- $\beta$ R2 translocating into the primary cilia.<sup>[28]</sup> Results showed that PLDN in  
367 Prx1<sup>+</sup> cells could significantly be knocked down by shRNA (Figure 7c, d). TGF- $\beta$ R2  
368 concentrating in primary cilia was decreasing markedly in PLDN knocked down group (Figure  
369 7e, f). The results of scratch assay and transwell assay showed that the effect of TGF- $\beta$ 1 on  
370 Prx1<sup>+</sup> cells migration ability was eliminated in PLDN knocked down group (Figure 7g, h, i).  
371 Western blot analysis showed that the Smad2/3 signaling pathway was also inhibited at the  
372 same time (Figure 7j, k).

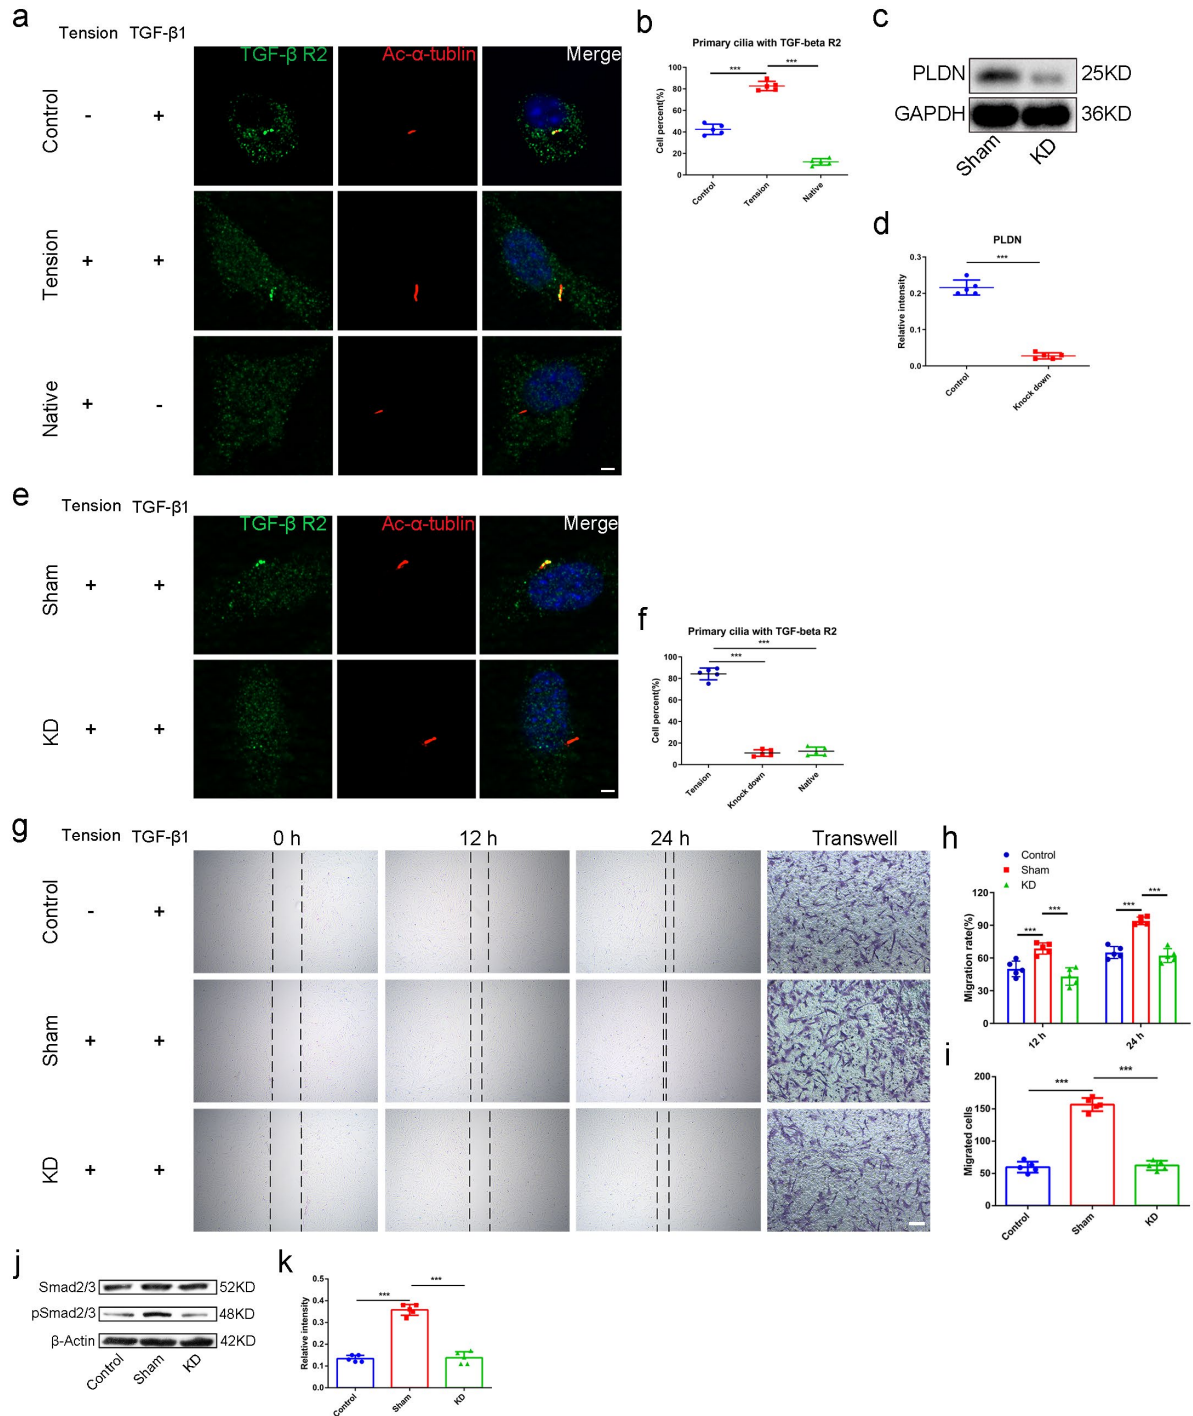

373

374 **Figure 8. TGF-β1 enhanced the migration of Prx1<sup>+</sup> cells via ciliary TGF-β signaling.** (a)

375 Representative image of immunofluorescent analysis of TGF-β2 (green), Ac-α-tubulin (red)

376 staining of primary cilia, and DAPI (blue) staining of nuclei stimulation by mechanical force

377 with TGF-β1 (0.1 ng/ml) in Prx1<sup>+</sup> cells. Scale bar, 5 μm. n=5 per group. (b) Quantitative

378 analysis of cell percent that the TGF-β2 was concentrated in the primary cilia. n=5 per group.

379 (c) Western blot analysis of PLDN in groups treated with or without PLDN-siRNA. (d)

380 Quantitative analysis of western blot. n=5 per group. (e) Representative image of  
381 immunofluorescent analysis of TGF- $\beta$ R2 (green), Ac- $\alpha$ -tubulin (red) staining, and DAPI (blue)  
382 staining of nuclei stimulation by mechanical force with TGF- $\beta$ 1 (0.1 ng/ml) in Prx1<sup>+</sup> cells  
383 treated with or without PLDN-siRNA. Scale bar, 5 $\mu$ m. (f) Quantitative analysis of cell percent  
384 that the TGF- $\beta$ R2 was concentrated in the primary cilia. n=5 per group. (g) Scratch assay and  
385 transwell assay of Prx1<sup>+</sup> cells. (h) Quantitative analyses of scratch assay. n=5 per group. (i)  
386 Quantitative analyses of transwell assay. n=5 per group. (j) Western blot analysis of  
387 Smad2/3/pSmad2/3 signaling. (k) Quantitative analyses of western blot. n=5 per group. \*P <  
388 0.05, \*\*P < 0.01, \*\*\*P < 0.001.

389

## 390 **Discussion**

391 Prx1<sup>+</sup> cells and mechanical stimulation have been extensively studied during the skeletal  
392 development.<sup>[41,42]</sup> However, their role in enthesis regeneration is poorly understood. In this  
393 study, we identified that Prx1<sup>+</sup> cells are involved in enthesis development, but may not be  
394 important player in adult enthesis. However, during injury repair, Prx1<sup>+</sup> cells could migrate to  
395 the injury area to participate in enthesis healing. Proper mechanical stimulation could increase  
396 the release of TGF- $\beta$ 1 to immobilize Prx1<sup>+</sup> cells and promote enthesis injury repair. Ciliary  
397 TGF- $\beta$ R2 was essential for TGF- $\beta$  signaling transmission during proper mechanical stimulation  
398 promoting enthesis injury repair procedure. As far as we known, this is the first report  
399 uncovering the characteristics of Prx1<sup>+</sup> cells on enthesis development and injury healing, and  
400 provided new insights into the progenitor source for enthesis injury repair. Meanwhile, this  
401 study found a new mechanism about the mechanical stimulation signal transmission, and had  
402 pieced together a mechanical conduction mechanism.

403 The microstructure regeneration of enthesis is a difficult issue considering the complicated  
404 structure of enthesis consisting of four continuous gradient layers: bone, calcified fibrocartilage,  
405 uncalcified fibrocartilage and tendon, and low self-regeneration ability.<sup>[8]</sup> Therefore, current

406 treatments aim to regenerate enthesis microstructure to acquire reliable long-term clinical  
407 results. A previous study found that low-intensity pulsed ultrasound stimulation after  
408 autologous adipose-derived stromal cell transplantation could improve the fibrocartilage and  
409 bone regeneration, leading to a better enthesis healing quality.<sup>[43]</sup> Recently, tissue engineering  
410 was prevalent for repairing enthesis injury and showed promising results of fibrocartilage and  
411 bone regeneration, associated with better mechanical testing results.<sup>[8,44,45]</sup> In the present studies,  
412 we found that better regeneration of fibrocartilage was highly correlated with the number of  
413 Prx1<sup>+</sup> cells and was accompanied by better mechanical testing results, which was consistent  
414 with previous reports. These data suggested that the fibrocartilage regeneration directly  
415 influenced the enthesis healing quality and could be a reliable indicator for the enthesis  
416 regeneration.

417 Mechanical stimulation is a common therapy in the clinic, while it is a double-edged sword  
418 for enthesis healing. On one hand, appropriate mechanical load could stimulate local blood  
419 circulation, promote mesenchymal stem cell differentiation, and help releasing anti-  
420 inflammatory factors to improve tissue healing.<sup>[46-48]</sup> Wang et al<sup>[49]</sup> reported if the training  
421 started early, such as 96 hours after acute patellar tendon enthesis injury, it will lead to better  
422 recovery results with fibrocartilage and mechanical test parameters in a rabbit model. On the  
423 other hand, excessive mechanical loading in the early healing phase might delay or even inhibit  
424 tissue healing.<sup>[14]</sup> Rodeo et al found that immediate excessive treadmill training at the early  
425 stage causes delayed enthesis healing in the murine enthesis repair model.<sup>[50]</sup> These reports  
426 suggested that enthesis could only respond favorably to controlled loading after injury. In the  
427 present studies, we chose a 7-days delayed mechanical stimulation and tested 3 sets of  
428 mechanical intensity. We found that 20 minutes per day mechanical stimulation (7-days delayed,  
429 10 m/min, 5 days per week) could enhance Prx1<sup>+</sup> cell migration, improve the quality of  
430 fibrocartilage and bone regeneration in the enthesis, resulting in better biomechanical results.  
431 Our finding suggested that appropriate mechanical stimulation (7-days delayed, 10 m/min, 20

432 minutes per day, five days per week) indeed improve early entheses healing, and this model was  
433 reliable to uncover the mechanism of mechanical stimulation-induced entheses healing.

434 Our results showed that proper mechanical stimuli could enhance the migration of Prx1<sup>+</sup>  
435 cells and Prx1<sup>+</sup> cells could differentiate in cartilage and bone cells which play a critical role in  
436 entheses healing. We know that Prx1<sup>+</sup> cells are important in skeletal development, especially  
437 during the embryonic development.<sup>[17]</sup> However, their role in entheses development and  
438 contribution to skeletal tissue regeneration was poorly understood. In this study, we found that  
439 GFP<sup>+</sup> cells (active Prx1<sup>+</sup> cells) were abundant in the entheses during early stage and disappeared  
440 at adulthood. The tdTomato<sup>+</sup> cells mainly localized within the periosteum, perichondrium, and  
441 growth plate at adulthood, which indicated that Prx1<sup>+</sup> cells confined at these places were active  
442 in young age and quiescence, but not completely disappear at adulthood. Meanwhile, there were  
443 no Prx1<sup>+</sup> cells at the entheses area in adult mice. When entheses injury happens, Prx1<sup>+</sup> cells  
444 could migrate to the injury area to participate in the healing process. Besides, our results showed  
445 that Prx1<sup>+</sup> cell numbers at the entheses were related to the healing quality, suggesting that Prx1<sup>+</sup>  
446 cells were pivotal for entheses healing. One limitation of this study is that we did not investigate  
447 other mesenchymal sub-population in the current study.

448 How did mechanical stimulation enhance the migration of Prx1<sup>+</sup> cells to the healing site?  
449 As we known, TGF- $\beta$  signaling plays an essential role in tissue homeostasis and injury healing  
450 and TGF- $\beta$  signaling activation is in precise spatial and temporal manner.<sup>[51-53]</sup> The level of  
451 TGF- $\beta$ 1 was relatively high at the healing interface and TGF- $\beta$ 1 could promote the migration  
452 of MSCs to modulate bone remodeling.<sup>[37]</sup> Robertson et al reported that TGF- $\beta$ 1 function is  
453 mainly regulated by its activation rather than synthesis or secretion.<sup>[54]</sup> Hence, we mainly  
454 focused on the activation of TGF- $\beta$ 1. Our results showed that TGF- $\beta$  signaling is involved in  
455 entheses healing. During this process, active TGF- $\beta$ 1 concentration was elevated, and was  
456 further enhanced by mechanical stimulation. In vitro, we found that mechanical stimulation  
457 couldn't independently improve Prx1<sup>+</sup> cells migration ability, while it could enhance the



458 sensitivity of the Prx1<sup>+</sup> cells to TGF-β1. Although we didn't further reveal its effects on Prx1<sup>+</sup>  
459 cells migration in vivo, it still provided new insights in new mechanisms about the mechanical  
460 stimulation signal transmission. At the same time, we could not rule out the involvement of  
461 other signaling pathways in this process.

462 Primary cilia have been recognized as an essential cellular mechanoreceptor and  
463 mechanosensitive channels.<sup>[55,56]</sup> Still, the regulatory mechanism of primary cilia in mechanical  
464 stimulation transmission remains unclear, even controversial. Polycystin-1 (PC1) and  
465 polycystin-2 (PC2), co-distribution in the primary cilia of kidney epithelium, was reported to  
466 be involved in the regulation of intracellular Ca<sup>2+</sup> signaling and transfer mechanical stimuli.<sup>[24]</sup>  
467 In addition to PC1 and PC2, another primary cilia-based calcium channels-transient receptor  
468 potential (TRP) could also sense mechanical stimuli via conducting Ca<sup>2+</sup> signaling.<sup>[57]</sup>  
469 Nonetheless, many calcium channels are not only localized in the ciliary membrane, but also  
470 other parts of the cells, so it is difficult to differentiate the difference between ciliary and  
471 cytosolic Ca<sup>2+</sup> in response to the same mechanical stimuli. Delling et al found that cilia-specific  
472 Ca<sup>2+</sup> influxes were not observed in physiological or even highly supraphysiological levels of  
473 fluid flow.<sup>[58]</sup> In this study, we found that knocking out IFT88 prevented the  
474 mechanotransduction. Inhibition of ciliary TGF-β signaling could decrease the  
475 mechanotransduction, suggesting that primary cilia could regulate mechanical stimuli via  
476 ciliary TGF-βR2. This finding provides new insights into the role of primary cilia in mechanical  
477 stimuli transmission. However, we didn't exclude ciliary Ca<sup>2+</sup> signaling or other ciliary  
478 signaling pathway participating in this mechanical stimulation transmission process in this  
479 study.

## 480 **Conclusion** 481

482 In conclusion, Prx1<sup>+</sup> cells were an essential subpopulation of progenitors for entesis  
483 development and injury repair. Mechanical stimulation could increase the release of TGF-β1

484 and enhance mobilization of Prx1<sup>+</sup> cells to promote enthesis injury repair via ciliary TGF- $\beta$   
485 signaling.

486

## 487 **Experimental Section/Methods**

### 488 **Collection of Single-Cell Suspension from Supraspinatus enthesis**

489 In general, 10-12 suspensions tendon enthesis tissue (E15.5, P7 and P28), including the  
490 tendon (one millimeter in length) and the portion of the humeral head proximal to the growth  
491 plate near the tendon attachment, were collected from pooled sibling shoulders (five to six mice  
492 per pool). Fresh enthesis tissue were finely chopped with small scissors in 1 ml of Dulbecco's  
493 modified Eagle's medium (DMEM), then digested in 0.5 % type I collagenase (Life  
494 Technologies) and 7 U/ml Dispase II (Gibco) at 37 °C for 30 min. Then the supernatant was  
495 collected and filtered through 70  $\mu$ m cell filters (Falcon BD), and centrifuged for 5 min at 300  
496 g, before re-suspending the pellet in DMEM containing 2 % serum, and the cell suspension was  
497 kept on ice until load on chip.

498

### 499 **Flow Cytometry and Cell Sorting**

500 Collected cell suspension were blocked with purified rat anti-mouse CD16/CD32 (BD  
501 Pharmingen, dilution 1:100) for 10 min, then stained with fluorophore conjugated antibodies.  
502 Antibodies used in this study are anti-mouse CD45-APCCy7, Ter119-APCCy7 (Biolengend),  
503 DAPI (eBiosciences) stain was used to exclude dead cells. For cell sorting, single cells were  
504 gated using doublet-discrimination parameters and cells were collected in FACS buffer (1x  
505 HBSS, 2 % FBS, 1 mM EDTA). Cell viability was assessed with trypan blue and only samples  
506 with > 85% viability were processed for further sequencing.

507

### 508 **scRNA-Seq Sequencing, Data processing and quality control**

509       Around 10,000 sorted live CD45-Ter119- cells for each timepoint sample were  
510 resuspended in FACS buffer according to the recommendations provide by 10× Genomics for  
511 optimal cell recovery. Single-cell mRNA libraries were built using the Chromium Single Cell  
512 3' kit (v3), libraries sequenced on an Illumina NovaSeq 500 instrument. Single-cell fastq  
513 sequencing reads from each sample were processed by aligning reads and obtaining unique  
514 molecular identifier (UMI) counts and converted to gene expression matrices, after mapping to  
515 the mouse (mm10) reference genome using the Cell Ranger v4.0.0 pipeline, according to the  
516 standard workflow (10× Genomics).

517

### 518 **scRNA-seq Data Ananlysis**

519       Quality control was conducted for each dataset, cells with less than 200 genes and the top  
520 10% cells were removed to minimize multiplet possibility. Cells were retained if the percent  
521 mitochondrial reads were lower that 20% (8919 cells for embryonic day 15.5, 7489 cells for  
522 postnatal day 7 and 5124 cells for postnatal day 28). Data integration, graph-based cell  
523 clustering, dimensionality reduction, and data visualization were analyzed by the Seurat R  
524 package (v3.2). Data integration was performed via canonical correlation analysis to remove  
525 batch effect. Feature (gene) data was scaled in order to remove unwanted sources of variation  
526 using the Seurat ScaleData function for percent mitochondrial reads, number of genes detected  
527 and predicted cell cycle phase difference. Non-linear dimension reduction was performed using  
528 uniform manifold projection (UMAP) and graph-based clustering was performed using the  
529 Louvain algorithm. The number of statistically significant principal components were set  
530 empirically by testing top 10 differentially expressed genes (MAST method) between the  
531 clusters. Subsetting was performed by assessing marker gene expression across clusters,  
532 Clusters associated with the following cell-types were excluded from our analysis: muscle cells,  
533 immune cells blood cells, endothelial cells and undefined cells rich of histone genes. Functional  
534 annotation of the marker genes relative to GO terms was performed using ClusterProfiler

535 (v3.18). Trajectory analysis of the tendon enthesis development was performed using Monocle  
536 (v2.4.0).

537

### 538 **Animals and treatment**

539 The *Prx1CreER-GFP* (Strain origin: C57BL6N/129; Stock No: 029211), *ITF88<sup>flox/flox</sup>*  
540 (Strain origin: C57BL6N/129; Stock No: 022409); *Rosa26tdTomato* (Strain origin:  
541 C57BL6N/129; Stock No: 007909) mouse strain was purchased from Jackson Laboratory (Bar  
542 Harbor, ME).

543 *Prx1CreER-GFP* mice were crossed with *ITF88<sup>flox/flox</sup>* mice. The offspring were  
544 intercrossed to generate the following genotypes: WT, *Prx1CreER-GFP*, *Prx1CreER-GFP*;  
545 *ITF88<sup>flox/flox</sup>*. Then, *Prx1CreER-GFP*; *ITF88<sup>flox/flox</sup>* mice were crossed with *Rosa26tdTomato*  
546 mice. The offspring were intercrossed to generate the following genotypes: *Prx1CreER-GFP*;  
547 *Rosa26tdTomato* mice (mice expressing tdTomato driven by Cre recombinase in Prx1<sup>+</sup> cells),  
548 *Prx1CreER-GFP*; *ITF88<sup>flox/flox</sup>*; *Rosa26tdTomato* mice (conditional deletion of *ITF88* in Prx1  
549 lineage cells and expressing tdTomato, referred to as *ITF88<sup>-/-</sup>* herein). To induce Cre  
550 recombinase activity, we injected mice at designated time points with tamoxifen (75 mg/kg,  
551 i.p.) for consecutive five days.

552 The genotype of the mice was determined by PCR analysis of genomic DNA, extracted  
553 from mouse tails using the primers as follows. *Prx1CreER-GFP* allele forward, 5'-  
554 ATACCGGAGATCATGCAAGC-3', reverse, 5'-GGCCAGGCTGTTCTT CTTAG-3', control  
555 forward, 5'- CTAGGCCACAGAATTGAAAGATCT-3' and control reverse, 5'-  
556 GTAGGTGGAAATTCTAGCATCATCC-3'; *ITF88<sup>-/-</sup>* allele forward, 5'-  
557 TGAGGACGACCTTTACTCTGG-3', and reverse, 5'-CTGCCATGACTGGTTCT CACT-3';  
558 *Rosa26tdTomato* allele forward, 5'- AAGGGAGCTGCAGTGGAGTA-3', reverse, 5'-  
559 CCGAAAATCTGTGGGAAGTC-3', control forward, 5'-GGCATTAAAG CAGCGTATCC-  
560 3' and control reverse, 5'- CTGTTCCCTGTACGGCATGG-3'.

561

## 562 **Rotator cuff injury repair model**

563 Twelve weeks old male mice underwent rotator cuff injury repair using protocol as  
564 previously reported.<sup>[15,59]</sup> After anesthetized with pentobarbital (0.6 mL/20 g; Sigma-Aldrich,  
565 St. Louis, MO), a longitudinal skin incision was made to expose the deltoid muscle, and a  
566 transverse cut was made on it. The acromion was pulled away to expose the supraspinatus  
567 tendon. After the supraspinatus tendon was grasped with 6-0 Prolene (Ethicon, Somerville, NJ,  
568 USA), it was sharply transected at the insertion site on the greater tuberosity, and fibrocartilage  
569 layer was removed with a scalpel blade. A bone tunnel was made transversely to the distal  
570 greater tuberosity. Then, the suture was passed through the drilled hole and tied the  
571 supraspinatus tendon to its anatomic position. The skin and deltoid muscles were closed in layer.  
572 To block the TGF- $\beta$ 1, hydrogel loading with the TGF- $\beta$ 1 neutralizing antibody was used. Mice  
573 were allowed free cage activities. At postoperative four weeks and eight weeks, the mice  
574 receiving treadmill exercise or not were sacrificed, and the supraspinatus-humeral head  
575 composites were harvested for further study.

576

## 577 **Mechanical load in vivo and in vitro**

578 A motor-powered treadmill with 12 lanes was used to generate a mechanical load to the  
579 enthesis in vivo. Treadmill exercise was conducted as previously reported.<sup>[15,50]</sup> All the mice  
580 underwent one-week adaptive training to get familiar with the lane environment before surgery.  
581 Treadmill speed was increased daily until all mice tolerated running at 10 m/min for 30 minutes  
582 per day. At postoperative day 7, the mice in the treadmill group ran at a speed of 10 m/min on  
583 a 0° declined lane for 10 minutes, 20 minutes or 30 minutes, five days per week.

584 A cell load system (CellLoad-300, Hao Mian, China) was used to generate tensile  
585 mechanical load on Prx1<sup>+</sup> cells. Prx1<sup>+</sup> cells were seeded on a plate which could expand and

586 contract under external forces, at a density of  $1.5 \times 10^4 / \text{cm}^2$ . The parameters were set as follows:  
587 1Hz, 5%, 20 minutes per day.

588

### 589 **Immunofluorescence**

590 Humeral head and supraspinatus tendon composite were harvested and fixed in the 4%  
591 paraformaldehyde in PBS overnight at room temperature. After decalcified and dehydrated,  
592 samples were embedded in Tissue-Tek<sup>®</sup> O.C.T. Compound (SAKURA, Torrance, USA) and  
593 cut into 10  $\mu\text{m}$  thickness of sagittal sections. Cell samples were fixed in the 4%  
594 paraformaldehyde in PBS for 30 minutes at room temperature. Both the parts and cell samples  
595 were blocked in 5% BSA for 40 min at room temperature and incubated with the primary  
596 antibodies anti-DMP1 (Abcam, 1:400, ab13970), anti-GFP (Abcam, 1:400, ab13970 or 1:400,  
597 ab290), anti-Sox9 (Abcam, 1:400; ab185966), anti-TGF- $\beta$ R2 (Abcam, 1:400, ab186838) at 4°C  
598 overnight. After washing, the sections were then incubated with the respective secondary  
599 antibodies (1:500, Abcam) for 1 hour at room temperature and sealed with DAPI. The images  
600 were captured with a Leica TCS-SP8 confocal microscope (Leica, Germany).

601

### 602 **Histological analysis**

603 After radiographic assay, fixed samples were decalcified in EDTA for 14 days, dehydrated  
604 in gradient ethanol, embedded in paraffin, and then cut into 5 $\mu\text{m}$  slices. The sections were  
605 stained with hematoxylin and eosin for general histology analyses. Two blinded observers  
606 measured histological tendon maturing score according to a previous report (Table S1)<sup>[50]</sup>.

607

### 608 **Biomechanical test**

609 An Instron biomechanical testing system (Model 5942, Instron, MA) was used to detect  
610 the failure load and stiffness of these samples. The tendon was secured in a clamp using  
611 sandpaper, while the humerus firmly clamped with a vice grip. The specimens were tested at

612 room temperature, and samples were preconditioned with 0.1 N and then loaded to failure at a  
613 rate of 0.1 mm/s. A consistent gauge length was used throughout the test. Data were excluded  
614 if the tendon slipped out of the grip or did not fail at the supraspinatus tendon attachment site.

615

## 616 **ELISA**

617 The supraspinatus tendon insertion specimens were harvested at postoperative 0 day, and  
618 3 days, and 1, 2, 4, 8, and 10 weeks. We removed the muscle belly and kept the tendon and the  
619 portion of the humeral head proximal to the growth plate near the tendon attachment. Then, we  
620 determine the concentration of active TGF- $\beta$ 1 in the enthesis using the ELISA Development  
621 Kit (R&D Systems, Minneapolis, MN) according to the manufacturer's instructions.

622

## 623 **Cell culture**

624 To obtain Prx1<sup>+</sup> cells, 1-2 weeks old *Prx1CreER-GFP* mice were sacrificed. The tibiae  
625 and femurs were dissected and excised into chips of approximately 1-3 mm<sup>3</sup> with scissors. Then,  
626 the chips were suspended into a 25 cm<sup>2</sup> plastic culture flask with 5 ml of  $\alpha$ -MEM containing  
627 10% (vol/vol) FBS in the presence of 3 mg/ml (wt/vol) of collagenase II (Sigma) and digested  
628 the chips for one h in a shaking incubator at 37°C with a shaking speed of 150 rpm. Washed the  
629 enzyme-treated chips with  $\alpha$ -MEM and got the Prx1<sup>+</sup> cells by FACS. Reseeded the cells and  
630 changed the medium every 48h. In the same way, we isolated the Prx1<sup>+</sup> cells without cilia  
631 through *Prx1CreER-GFP*; *IFT88<sup>fllox/fllox</sup>* mice and *Prx1CreER-GFP*; *IFT88<sup>fllox/fllox</sup>*;  
632 *Rosa26tdTomato* mice after tamoxifen injection for 5 days (75 mg/kg, i.p.).

633

## 634 **Short hairpin RNAs transfection**

635 Prx1<sup>+</sup> cells were transfected with shRNA targeting PLDN (shRNA#1: 5'-  
636 ATACACTGGAACAAGAGATTT-3', shRNA#2: 5'-CGCCAAGCTGGTGACTAT AAG-3')  
637 or with a scrambled shRNA for 12 hours using lentiviral vector (VectorBuilder, Cyagen

638 Biosciences, Santa Clara, CA) at an MOI of 20. Prx1<sup>+</sup> cells were maintained in growth media  
639 for a further 72 hours before the application of a mechanical stimulation.

640

#### 641 **Scratch assay**

642 For scratch wound assay, Prx1<sup>+</sup> cells ( $1.5 \times 10^4$  cells/cm<sup>2</sup>) were seeded into a stretchable  
643 dish and cultured with tension load (5%, 1Hz, 20 minutes per day) for three days. Cell  
644 monolayer could be formed at this time point. A straight scratch was produced using a pipette  
645 tip. After washed with PBS to remove floating cells, adherent, complete medium was added.  
646 Wound closure was imaged at the 0, 12, and 24 h of incubation time points. The rate of wound  
647 closure was calculated as follows: Migration rate (%) =  $(A_0 - A_n)/A_0 \times 100$ , where A<sub>0</sub>  
648 represents the initial wound area, and A<sub>n</sub> represents the remaining area of the wound at the  
649 appointed time.

650

#### 651 **Transwell assay**

652 After tension force load for 4 days,  $1 \times 10^4$  Prx1<sup>+</sup> cells were resuspended in 100μl α-MEM  
653 medium were loaded into the upper chamber of 24-well Transwell plate (Corning, NY, USA)  
654 with 8μm pore-sized filters. Complete medium, which supplemented with containing 0.1 ng/ml  
655 TGF-β1, was added to the lower chamber. After 12 h of incubation, cells that migrated to the  
656 lower surface of the filter were rinsed, fixed, and stained with 1% crystal violet. An optical  
657 microscope was used to photograph and count the migrated cells.

658

#### 659 **Western blotting.**

660 Prx1<sup>+</sup> cells with or without tension force load were collected for extracting protein.  
661 Western blotting was performed with 10% sodium dodecyl sulfate-polyacrylamide gel  
662 electrophoresis. Then the proteins were transferred into a nitrocellulose membrane, and  
663 membranes were blocked by nonfat milk. After blocking, the nitrocellulose membranes were



664 then incubated using anti-PLDN (Proteintech, 1:500, 10891-2-AP), anti-Smad2/3 Ab (Abcam,  
665 1:500, ab202445), anti-pSmad2/3 Ab (Abcam, 1:500, ab63399), anti-GAPDH (Proteintech,  
666 1:1000, 110494-1-AP). The figures for western blotting were visualized using enhanced  
667 chemiluminescence reagent (Thermo Fisher Scientific, Waltham, USA) and imaged by the  
668 ChemiDoc XRS Plus luminescent image analyzer (Bio-Rad).

669

### 670 **Statistical analysis**

671 The statistical results were analyzed by GraphPad Prism 7.0 software. Quantitative data  
672 were expressed as mean  $\pm$  standard deviation (SD), and differences above 2 groups were  
673 evaluated using one-way ANOVA with post hoc test, while the histological scores was  
674 performed using the Mann-Whitney test. Statistical significance was set at  $P < 0.05$ .

675

### 676 **Study approval**

677 All animal care protocols and experiments in this study were reviewed and approved by  
678 the Animal Care and Use Committees of the Laboratory Animal Research Center of our institute.  
679 All mice were maintained in the specific pathogen-free facility of the Laboratory Animal  
680 Research Center.

681

### 682 **Acknowledgements**

683 This work was supported by National Natural Science Foundation of China (No.  
684 81730068) and the Major Science and Technology project of Changsha Science and  
685 Technology Bureau (NO.41965).. Thanks to professor Xianghang Luo and Hui Xie for  
686 supporting of this research.

687

688

689

## **REFERENCES AND NOTES**

- 690 1. Meislin, R. J., Sperling, J. W. & Stitik, T. P. Persistent shoulder pain: epidemiology, pathophysiology, and diagnosis. *Am J Orthop.* **34**, 5-9 (2005).
- 691
- 692 2. Galatz, L. M., Griggs, S., Cameron, B. D. & Iannotti, J. P. Prospective longitudinal analysis of postoperative shoulder
- 693 function : a ten-year follow-up study of full-thickness rotator cuff tears. *J Bone Joint Surg Am* **83**, 1052-1056 (2001).
- 694 3. Chung, S. W., Kim, J. Y., Kim, M. H., Kim, S. H. & Oh, J. H. Arthroscopic repair of massive rotator cuff tears:
- 695 outcome and analysis of factors associated with healing failure or poor postoperative function. *Am J Sports Med* **41**,
- 696 1674-1683 (2013).
- 697 4. Thigpen, C. A., Shaffer, M. A., Gaunt, B. W., Leggin, B. G., Williams, G. R. & Wilcox, R. B. 3rd The American
- 698 Society of Shoulder and Elbow Therapists' consensus statement on rehabilitation following arthroscopic rotator cuff
- 699 repair. *J Shoulder Elbow Surg* **25**, 521-535 (2016).
- 700 5. Lee, S., Park, I., Lee, H. A. & Shin, S. J. Factors related to symptomatic failed rotator cuff repair leading to revision
- 701 surgeries after primary arthroscopic surgery. *Arthroscopy* , (2020).
- 702 6. Hein, J., Reilly, J. M., Chae, J., Maerz, T. & Anderson, K. Retear Rates After Arthroscopic Single-Row, Double-
- 703 Row, and Suture Bridge Rotator Cuff Repair at a Minimum of 1 Year of Imaging Follow-up: A Systematic Review.
- 704 *Arthroscopy* **31**, 2274-2281 (2015).
- 705 7. Galatz, L. M., Ball, C. M., Teefey, S. A., Middleton, W. D. & Yamaguchi, K. The outcome and repair integrity of
- 706 completely arthroscopically repaired large and massive rotator cuff tears. *J Bone Joint Surg Am* **86**, 219-224 (2004).
- 707 8. Chen, C. *et al.* Book-Shaped Acellular Fibrocartilage Scaffold with Cell-loading Capability and Chondrogenic
- 708 Inducibility for Tissue-Engineered Fibrocartilage and Bone-Tendon Healing. *ACS Appl Mater Interfaces* **11**, 2891-
- 709 2907 (2019).
- 710 9. B. P. Thampatty, J. H. Wang, Mechanobiology of young and aging tendons: In vivo studies with treadmill running. *J.*
- 711 *Orthop. Res.* **36**, 557-565 (2018).
- 712 10. Thomopoulos, S., Kim, H. M., Rothermich, S. Y., Biederstadt, C., Das, R. & Galatz, L. M. Decreased muscle loading
- 713 delays maturation of the tendon enthesis during postnatal development. *J. Orthop. Res.* **25**, 1154-1163 (2007).
- 714 11. Galloway, M. T., Lalley, A. L. & Shearn, J. T. The role of mechanical loading in tendon development, maintenance,
- 715 injury, and repair. *J Bone Joint Surg Am* **95**, 1620-1628 (2013).
- 716 12. Chang, K. V., Hung, C. Y., Han, D. S., Chen, W. S., Wang, T. G. & Chien, K. L. Early Versus Delayed Passive
- 717 Range of Motion Exercise for Arthroscopic Rotator Cuff Repair: A Meta-analysis of Randomized Controlled Trials.
- 718 *Am J Sports Med* **43**, 1265-1273 (2015).
- 719 13. Keener, J. D., Galatz, L. M., Stobbs-Cucchi, G., Patton, R. & Yamaguchi, K. Rehabilitation following arthroscopic
- 720 rotator cuff repair: a prospective randomized trial of immobilization compared with early motion. *J Bone Joint Surg*
- 721 *Am* **96**, 11-19 (2014).
- 722 14. Lee, B. G., Cho, N. S. & Rhee, Y. G. Effect of two rehabilitation protocols on range of motion and healing rates after
- 723 arthroscopic rotator cuff repair: aggressive versus limited early passive exercises. *Arthroscopy* **28**, 34-42 (2012).
- 724 15. Zhang, T. *et al.* Treadmill exercise facilitated rotator cuff healing is coupled with regulating periphery neuropeptides
- 725 expression in a murine model. *J. Orthop. Res.* , (2020).
- 726 16. T. A. Wynn, K. M. Vannella, Macrophages in Tissue Repair, Regeneration, and Fibrosis. *Immunity* **44**, 450-462
- 727 (2016).
- 728 17. Kawanami, A., Matsushita, T., Chan, Y. Y. & Murakami, S. Mice expressing GFP and CreER in osteochondro
- 729 progenitor cells in the periosteum. *Biochem. Biophys. Res. Commun.* **386**, 477-482 (2009).
- 730 18. Ouyang, Z. *et al.* Prx1 and 3.2kb Coll1a1 promoters target distinct bone cell populations in transgenic mice. *Bone* **58**,
- 731 136-145 (2014).
- 732 19. Martin, J. F. & Olson, E. N. Identification of a prx1 limb enhancer. *Genesis* **26**, 225-229 (2000).
- 733 20. Nauli, S. M., Kawanabe, Y., Kaminski, J. J., Pearce, W. J., Ingber, D. E. & Zhou, J. Endothelial cilia are fluid shear
- 734 sensors that regulate calcium signaling and nitric oxide production through polycystin-1. *Circulation* **117**, 1161-1171
- 735 (2008).
- 736 21. Bowie, E. & Goetz, S. C. TTBK2 and primary cilia are essential for the connectivity and survival of cerebellar
- 737 Purkinje neurons. *Elife* **9**, (2020).
- 738 22. Hilgendorf, K. I. *et al.* Omega-3 Fatty Acids Activate Ciliary FFAR4 to Control Adipogenesis. *Cell* **179**, 1289-
- 739 1305.e21 (2019).
- 740 23. Vion, A. C. *et al.* Primary cilia sensitize endothelial cells to BMP and prevent excessive vascular regression. *J. Cell*
- 741 *Biol.* **217**, 1651-1665 (2018).
- 742 24. Nauli, S. M. *et al.* Polycystins 1 and 2 mediate mechanosensation in the primary cilium of kidney cells. *Nat. Genet.*
- 743 **33**, 129-137 (2003).
- 744 25. Hua, K. & Ferland, R. J. Primary cilia proteins: ciliary and extraciliary sites and functions. *Cell. Mol. Life Sci.* **75**,
- 745 1521-1540 (2018).
- 746 26. Guemez-Gamboa, A., Coufal, N. G. & Gleeson, J. G. Primary cilia in the developing and mature brain. *Neuron* **82**,
- 747 511-521 (2014).
- 748 27. Anvarian, Z., Mykytyn, K., Mukhopadhyay, S., Pedersen, L. B. & Christensen, S. T. Cellular signalling by primary
- 749 cilia in development, organ function and disease. *Nat Rev Nephrol* **15**, 199-219 (2019).
- 750 28. L. Zheng, Y. Cao, S. Ni, *et al.*, Ciliary parathyroid hormone signaling activates transforming growth factor- $\beta$  to
- 751 maintain intervertebral disc homeostasis during aging. *Bone Res* **6**, 21 (2018).
- 752 29. Bisgrove, B. W. & Yost, H. J. The roles of cilia in developmental disorders and disease. *Development* **133**, 4131-4143
- 753 (2006).
- 754 30. Miyamoto, T. *et al.* Insufficiency of ciliary cholesterol in hereditary Zellweger syndrome. *EMBO J.* , e103499 (2020).
- 755 31. Bergmann, C., Guay-Woodford, L. M., Harris, P. C., Horie, S., Peters, D. & Torres, V. E. Polycystic kidney disease.
- 756 *Nat Rev Dis Primers* **4**, 50 (2018).

- 757 32. May-Simera, H. L. *et al.* Primary Cilium-Mediated Retinal Pigment Epithelium Maturation Is Disrupted in Ciliopathy  
758 Patient Cells. *Cell Rep* **22**, 189-205 (2018).
- 759 33. Robichaux, M. A. *et al.* Defining the layers of a sensory cilium with STORM and cryoelectron nanoscopy. *Proc. Natl.*  
760 *Acad. Sci. U.S.A.* **116**, 23562-23572 (2019).
- 761 34. Moore, E. R., Zhu, Y. X., Ryu, H. S. & Jacobs, C. R. Periosteal progenitors contribute to load-induced bone  
762 formation in adult mice and require primary cilia to sense mechanical stimulation. *Stem Cell Res Ther* **9**, 190 (2018).
- 763 35. Yuan, X. & Yang, S. Deletion of IFT80 Impairs Epiphyseal and Articular Cartilage Formation Due to Disruption of  
764 Chondrocyte Differentiation. *PLoS ONE* **10**, e0130618 (2015).
- 765 36. Fang, A. G., Schwartz, E. R., Moore, M. E., Sup, S., Thomopoulos, Primary cilia as the nexus of biophysical and  
766 hedgehog signaling at the tendon enthesis. *Sci Adv* **6**, (2020).
- 767 37. Tang Y, Wu X, Lei W, *et al.* TGF-beta1-induced migration of bone mesenchymal stem cells couples bone resorption  
768 with formation. *Nat Med.* 2009. 15(7): 757-65.
- 769 38. Villalobos, E. *et al.* Fibroblast Primary Cilia Are Required for Cardiac Fibrosis. *Circulation* **139**, 2342-2357 (2019).
- 770 39. Dalbay, M. T., Thorpe, S. D., Connelly, J. T., Chapple, J. P. & Knight, M. M. Adipogenic Differentiation of hMSCs  
771 is Mediated by Recruitment of IGF-1r Onto the Primary Cilium Associated With Cilia Elongation. *Stem Cells* **33**,  
772 1952-1961 (2015).
- 773 40. Pala, R., Alomari, N. & Nauli, S. M. Primary Cilium-Dependent Signaling Mechanisms. *Int J Mol Sci* **18**, (2017).
- 774 41. Yuan, X., Serra, R. A. & Yang, S. Function and regulation of primary cilia and intraflagellar transport proteins in the  
775 skeleton. *Ann. N. Y. Acad. Sci.* **1335**, 78-99 (2015).
- 776 42. Yuan, X. *et al.* Ciliary IFT80 balances canonical versus non-canonical hedgehog signalling for osteoblast  
777 differentiation. *Nat Commun* **7**, 11024 (2016).
- 778 43. Lu, H. *et al.* Initiation Timing of Low-Intensity Pulsed Ultrasound Stimulation for Tendon-Bone Healing in a Rabbit  
779 Model. *Am J Sports Med* **44**, 2706-2715 (2016).
- 780 44. Chen, C. *et al.* Functional decellularized fibrocartilaginous matrix graft for rotator cuff enthesis regeneration: A novel  
781 technique to avoid in-vitro loading of cells. *Biomaterials* **250**, 119996 (2020).
- 782 45. Tang, Y. *et al.* Structure and ingredient-based biomimetic scaffolds combining with autologous bone marrow-derived  
783 mesenchymal stem cell sheets for bone-tendon healing. *Biomaterials* **241**, 119837 (2020).
- 784 46. Olesen, J. L. *et al.* Expression of insulin-like growth factor I, insulin-like growth factor binding proteins, and collagen  
785 mRNA in mechanically loaded plantaris tendon. *J. Appl. Physiol.* **101**, 183-188 (2006).
- 786 47. Jonsson, P., Alfredson, H., Sunding, K., Fahlström, M. & Cook, J. New regimen for eccentric calf-muscle training in  
787 patients with chronic insertional Achilles tendinopathy: results of a pilot study. *Br J Sports Med* **42**, 746-749 (2008).
- 788 48. Ohberg, L., Lorentzon, R. & Alfredson, H. Eccentric training in patients with chronic Achilles tendinosis: normalised  
789 tendon structure and decreased thickness at follow up. *Br J Sports Med* **38**, 8-11; discussion 11 (2004).
- 790 49. Wang, L. *et al.* Effects of Time to Start Training After Acute Patellar Tendon Enthesis Injuries on Healing of the  
791 Injury in a Rabbit Model. *Am J Sports Med* **45**, 2405-2410 (2017).
- 792 50. Wada, S. *et al.* Postoperative Tendon Loading With Treadmill Running Delays Tendon-to-Bone Healing:  
793 Immunohistochemical Evaluation in a Murine Rotator Cuff Repair Model. *J. Orthop. Res.* **37**, 1628-1637 (2019).
- 794 51. Zhen, G. & Cao, X. Targeting TGFβ signaling in subchondral bone and articular cartilage homeostasis. *Trends*  
795 *Pharmacol. Sci.* **35**, 227-236 (2014).
- 796 52. Kim, K. K., Sheppard, D. & Chapman, H. A. TGF-β1 Signaling and Tissue Fibrosis. *Cold Spring Harb Perspect Biol*  
797 **10**, (2018).
- 798 53. Delaney, K., Kasprzycka, P., Ciemerych, M. A. & Zimowska, M. The role of TGF-β1 during skeletal muscle  
799 regeneration. *Cell Biol. Int.* **41**, 706-715 (2017).
- 800 54. Robertson, I. B. & Rifkin, D. B. Regulation of the Bioavailability of TGF-β and TGF-β-Related Proteins. *Cold Spring*  
801 *Harb Perspect Biol* **8**, (2016).
- 802 55. Bangs, F. & Anderson, K. V. Primary Cilia and Mammalian Hedgehog Signaling. *Cold Spring Harb Perspect Biol* **9**,  
803 (2017).
- 804 56. Hoey, D. A., Tormey, S., Ramcharan, S., O'Brien, F. J. & Jacobs, C. R. Primary cilia-mediated mechanotransduction  
805 in human mesenchymal stem cells. *Stem Cells* **30**, 2561-2570 (2012).
- 806 57. Luo, N. *et al.* Primary cilia signaling mediates intraocular pressure sensation. *Proc. Natl. Acad. Sci. U.S.A.* **111**,  
807 12871-12876 (2014).
- 808 58. Delling, M. *et al.* Primary cilia are not calcium-responsive mechanosensors. *Nature* **531**, 656-660 (2016).
- 809 59. Bell, R., Taub, P., Cagle, P., Flatow, E. L. & Andarawis-Puri, N. Development of a mouse model of supraspinatus  
810 tendon insertion site healing. *J. Orthop. Res.* **33**, 25-32 (2015).
- 811
- 812

813

## 814 Supporting Information

815

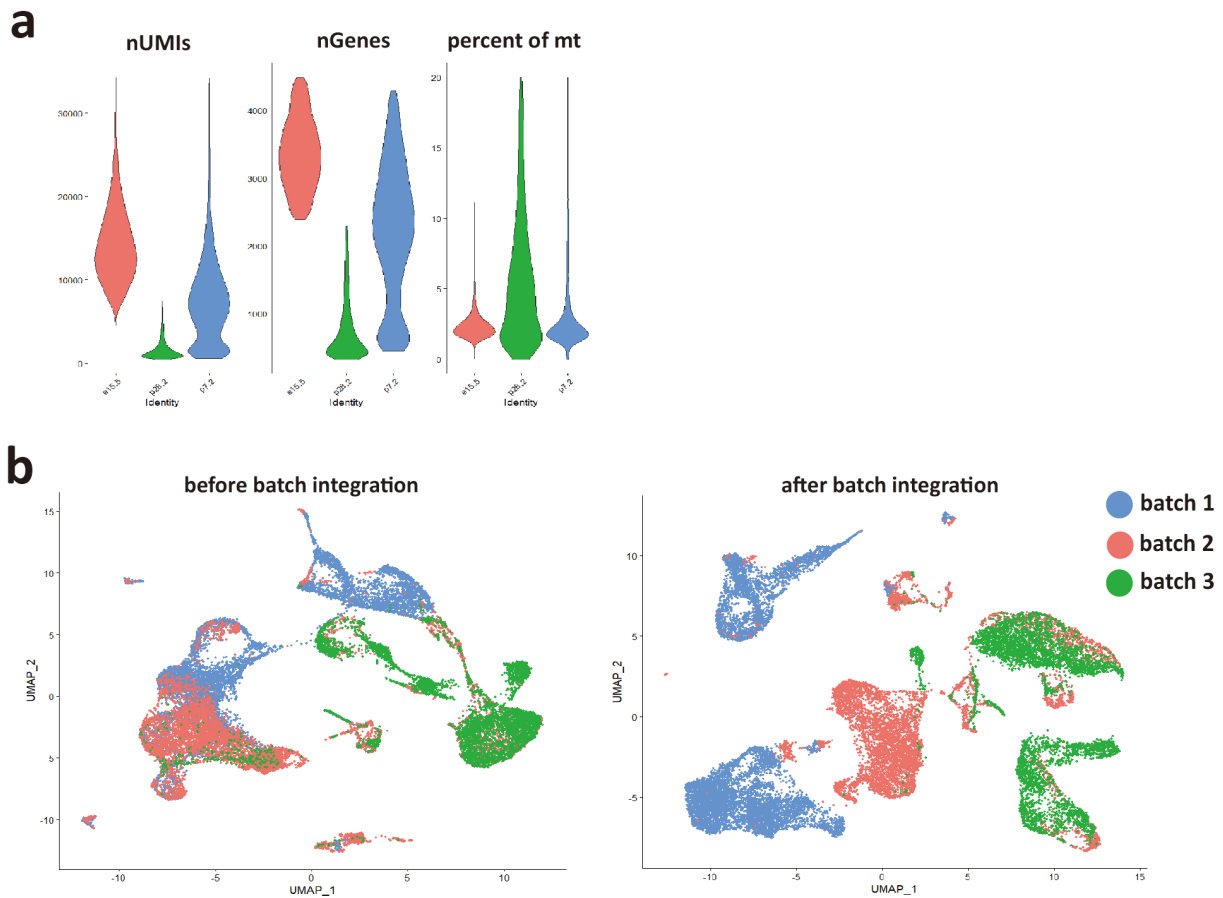

816

817 Figure S1. Quality control of unbiased scRNA-seq dataset. (a) Metrics used to assess the quality

818 of the scRNA-seq libraries. Cells with less than 200 genes and the top 10% cells were removed

819 to minimize multiplet possibility. (b) Batch effect was eliminated after data integration using

820 Seurat.

821

822

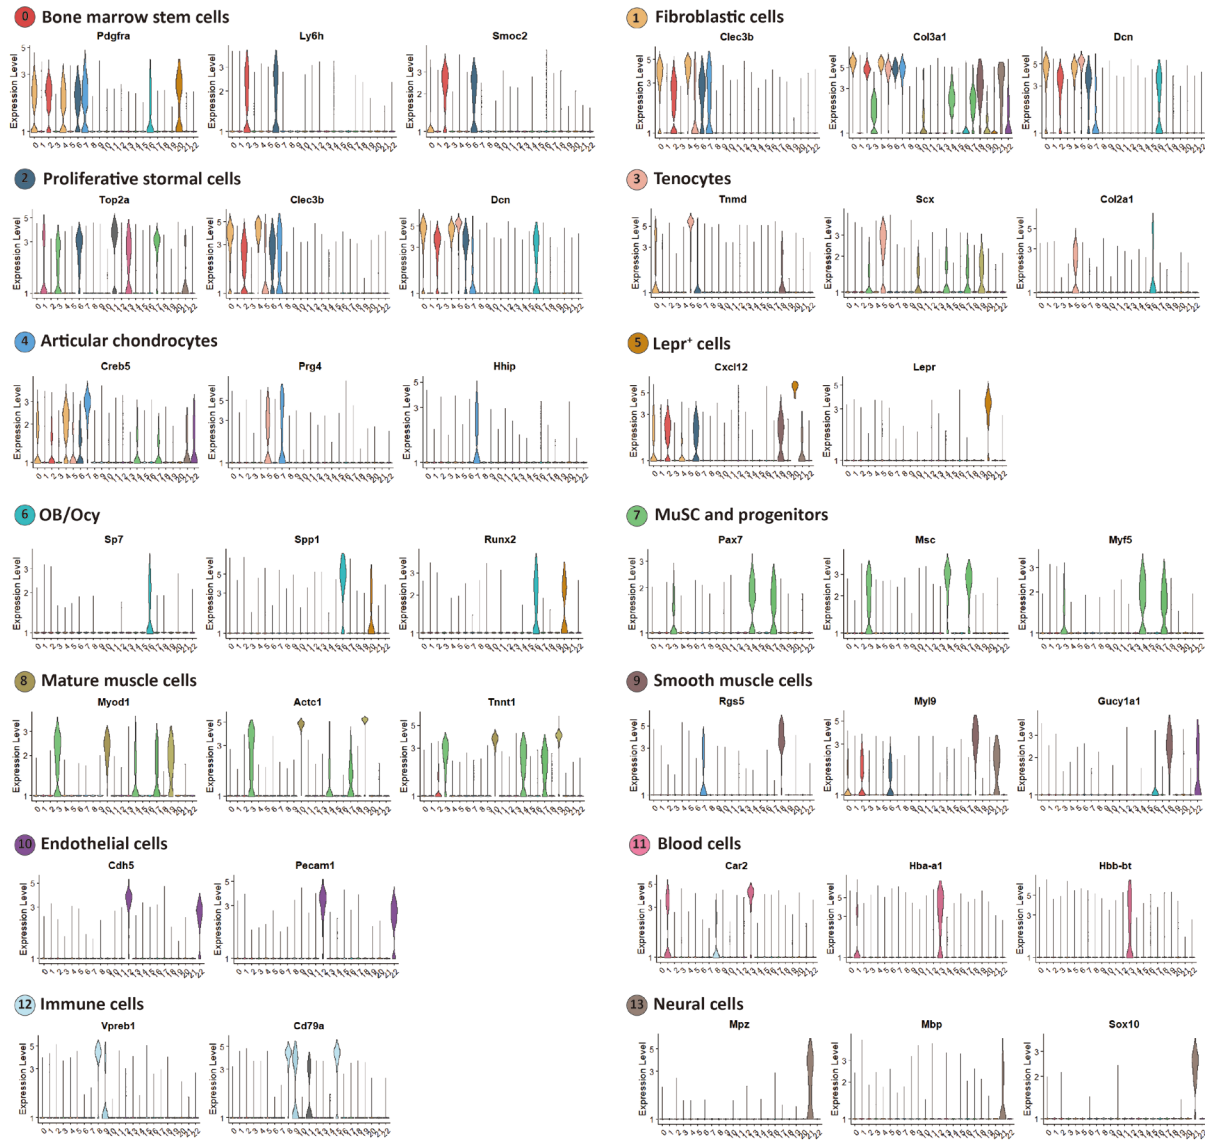

Figure S2. Gene expression defining clusters of E15.5, P7, P28 canonical correlation analysis.

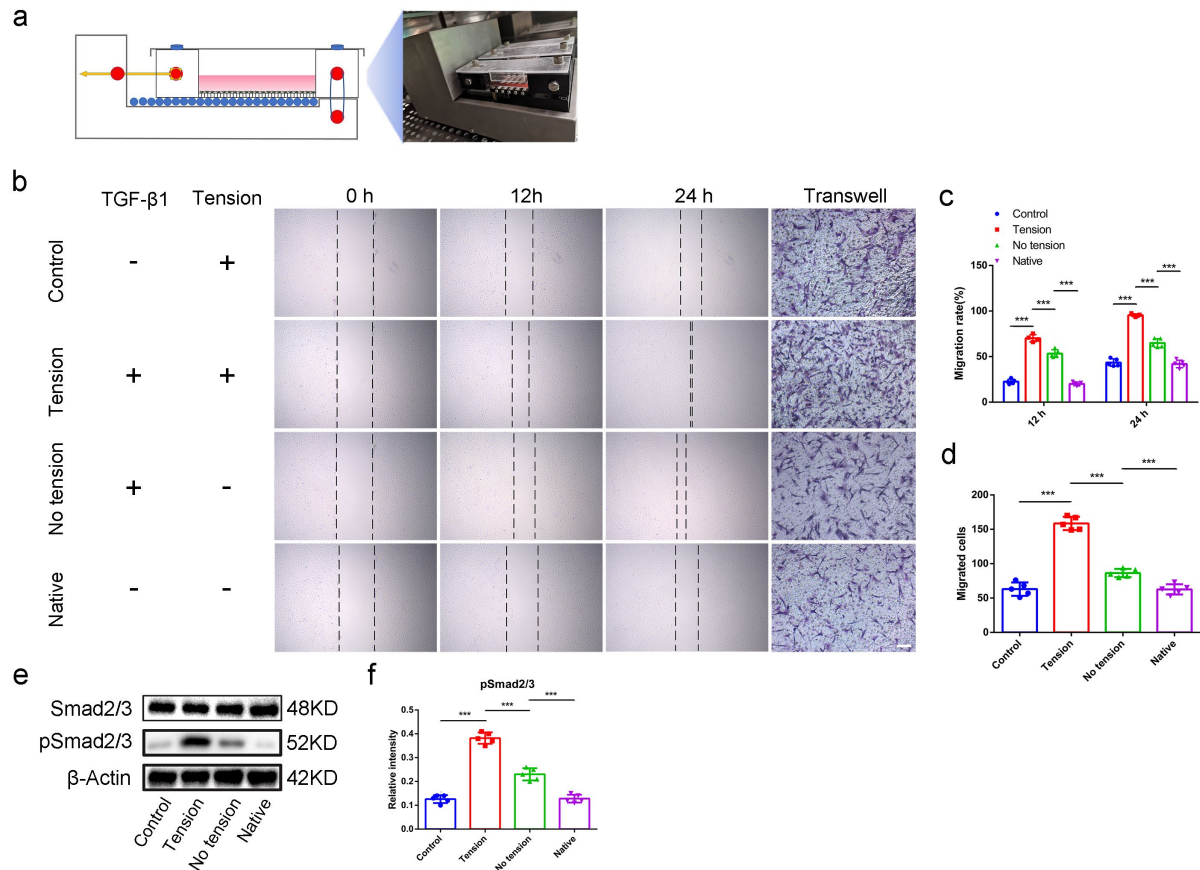

826

827 Figure S3. Mechanical stimulation could amplify the transmission of TGF- $\beta$  signaling. (a)

828 Schematic image and gross view of the cell loading system. (b) Scratch assay and transwell

829 assay of Prx1+ cells. Scale bar, 100  $\mu$ m. (c) Quantitative analyses of migration cells in a scratch

830 assay. n=5 per group. (d) Quantitative analyses of migration cells in transwell assay. n=5 per

831 group. (e) Western blot analyses of Smad2/3, phosphorylation of Smad2/3. (f) Quantitative

832 analyses of western blot. n=5 per group. \*P < 0.05, \*\*P < 0.01, \*\*\*P < 0.001.
